# Supplementary material for: Cyclooxygenase-Inhibiting Platinum(IV) Prodrugs with Potent Anticancer Activity
Source: MDPI journal article supplement (doi:10.3390/pharmaceutics14040787), 2022-04-03
Supplement: s1 [file s1]

# Supplementary Materials: Cyclooxygenase-Inhibiting Platinum(IV) Prodrugs with Potent Anticancer Activity

Aleen Khoury, Jennette A. Sakoff, Jayne Gilbert, Kieran F. Scott, Shawan Karan, Christopher P. Gordon and Janice R. Aldrich-Wright

## 1. Flash Chromatography

**Table S1.** The flash chromatography conditions for 1–4, including flow rates, gradients and elution of complexes represented by column volume (CV).

| Complex                                                                                   | Flowrate (mL/min) | Gradient (% MeOH (B)) over various CVs                 | Elution of complex (CV) |
|-------------------------------------------------------------------------------------------|-------------------|--------------------------------------------------------|-------------------------|
| [Pt(Phen)(SSDACH)(Indomethacin)(OH)](NO <sub>3</sub> ) <sub>2</sub> (1)                   | 4                 | 0% B for 4 CV<br>0–35% B for 3 CV<br>35–42% B for 5 CV | 9–11                    |
| [Pt(56Me <sub>2</sub> Phen)(SSDACH)(Indomethacin)(OH)](NO <sub>3</sub> ) <sub>2</sub> (2) | 4                 | 0% B for 8 CV<br>0–35% B for 3 CV<br>35–42% B for 6 CV | 14–16                   |
| [Pt(Phen)(SSDACH)(Aspirin)(OH)](NO <sub>3</sub> ) <sub>2</sub> (3)                        | 4                 | 0% B for 6 CV<br>0–20% B for 5 CV                      | 8–10                    |
| [Pt(56Me <sub>2</sub> Phen)(SSDACH)(Aspirin)(OH)](NO <sub>3</sub> ) <sub>2</sub> (4)      | 4                 | 0% B for 10 CV<br>0–20% B for 6 CV                     | 13–15                   |

## 2. Cellular Accumulation

**Table S2.** The number of cells per well for each cell line and replicate.

| Replicate | Cell line | Number of cells per well |
|-----------|-----------|--------------------------|
| 1         | A2780     | $3.20 \times 10^5$       |
|           | ADDP      | $3.05 \times 10^5$       |
| 2         | A2780     | $3.55 \times 10^5$       |
|           | ADDP      | $3.60 \times 10^5$       |
| 3         | A2780     | $4.50 \times 10^5$       |
|           | ADDP      | $4.80 \times 10^5$       |

### 3. NMR Spectra

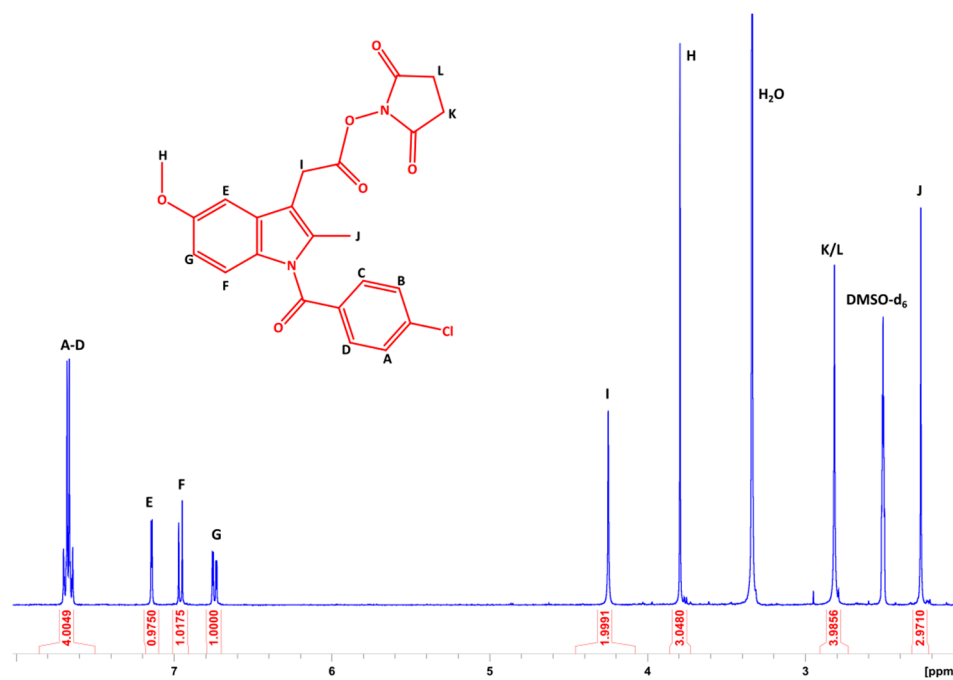

**Figure S1.** The <sup>1</sup>H NMR spectrum of indomethacin-NHS ester in DMSO-d<sub>6</sub> at 298 K. Insert: The chemical structure of indomethacin-NHS ester with assigned numbering.

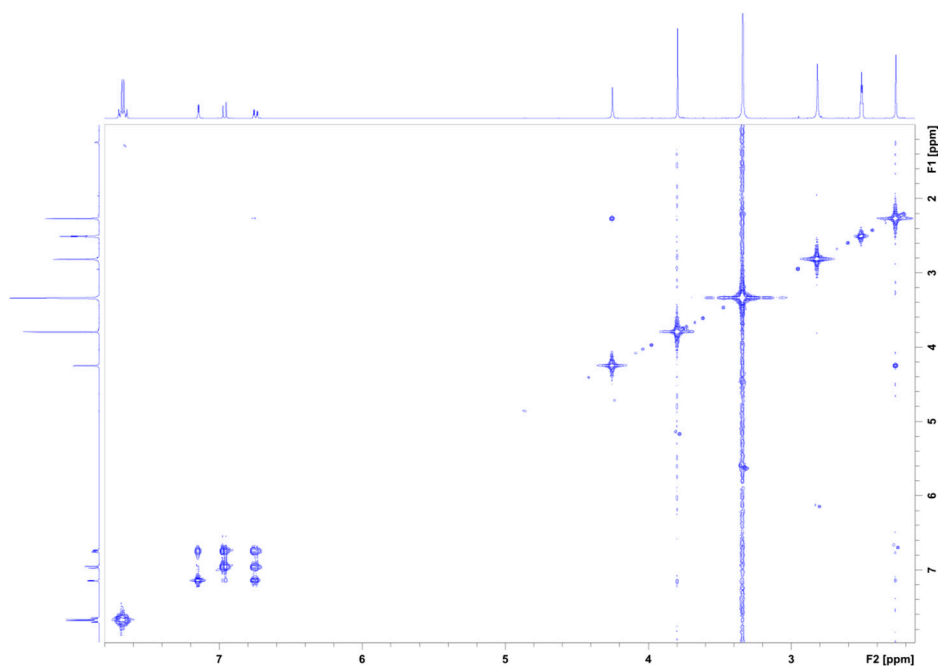

**Figure S2.** The COSY NMR spectrum of indomethacin-NHS ester in DMSO-d<sub>6</sub> at 298 K.

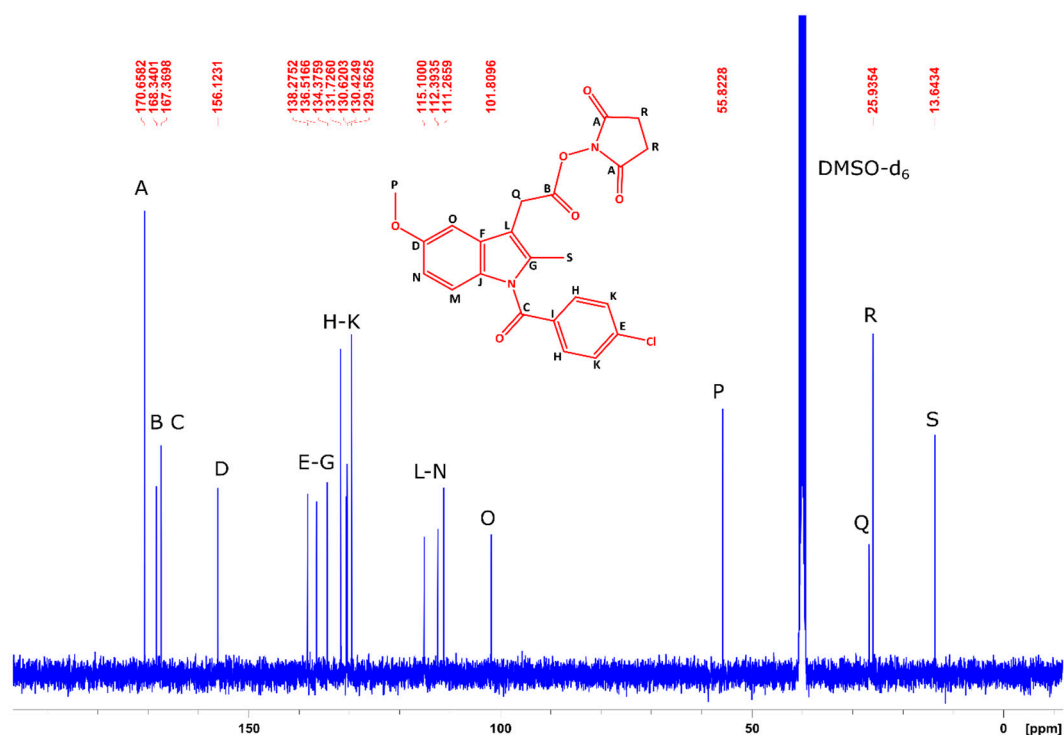

**Figure S3.** The  $^{13}\text{C}$  NMR spectrum of indomethacin-NHS ester in  $\text{DMSO-d}_6$  at 298 K. Insert: The chemical structure of indomethacin-NHS ester with assigned numbering.

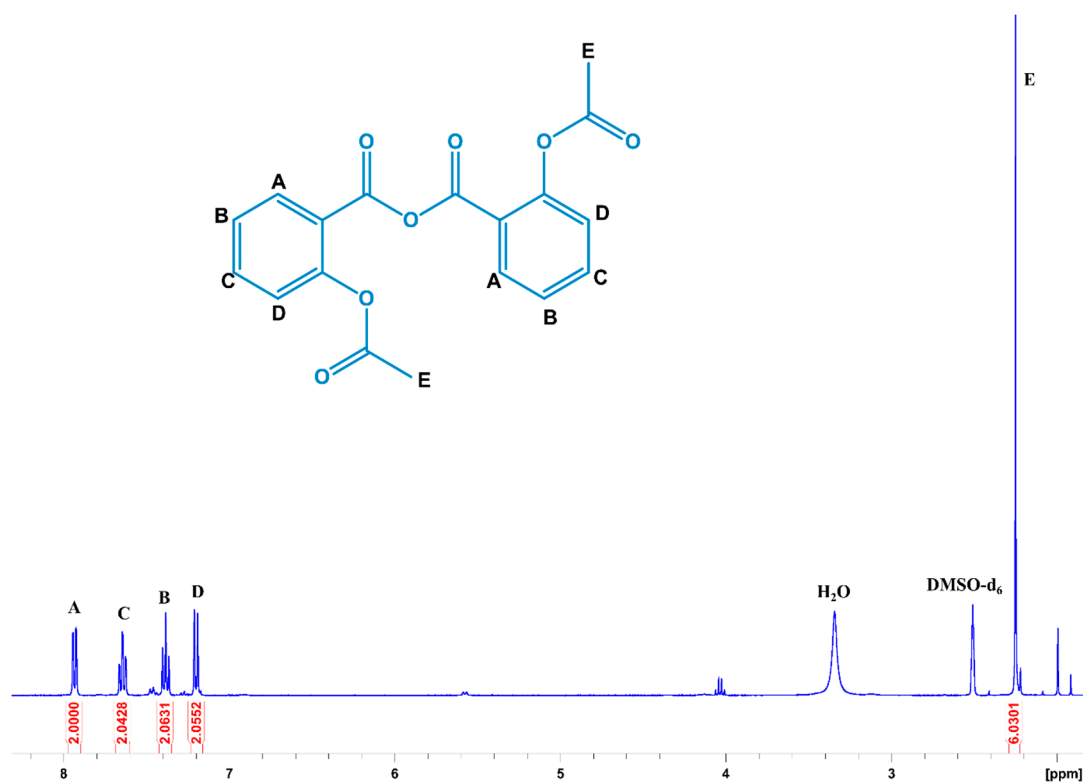

**Figure S4.** The  $^1\text{H}$  NMR spectrum of aspirin anhydride in  $\text{DMSO-d}_6$  at 298 K. Insert: The chemical structure of aspirin anhydride with assigned numbering.

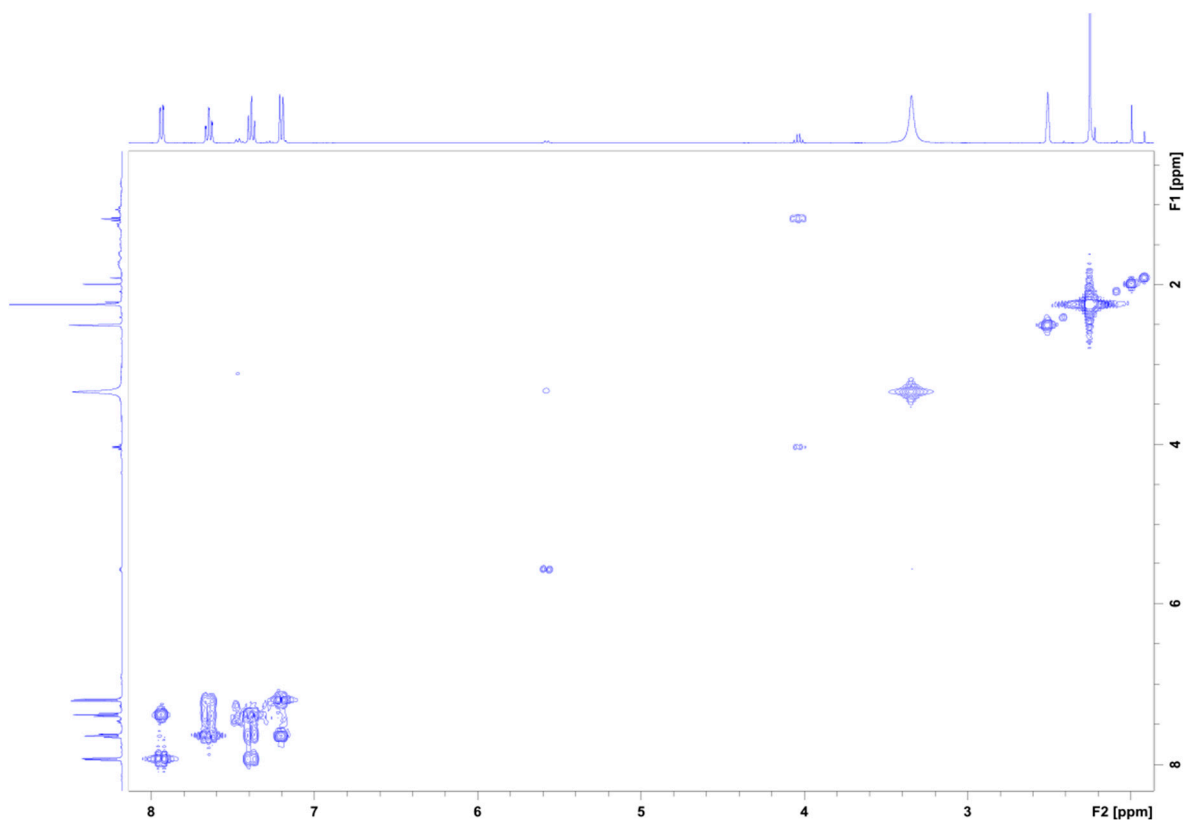

**Figure S5.** The COSY NMR spectrum of aspirin anhydride in DMSO- $d_6$  at 298 K.

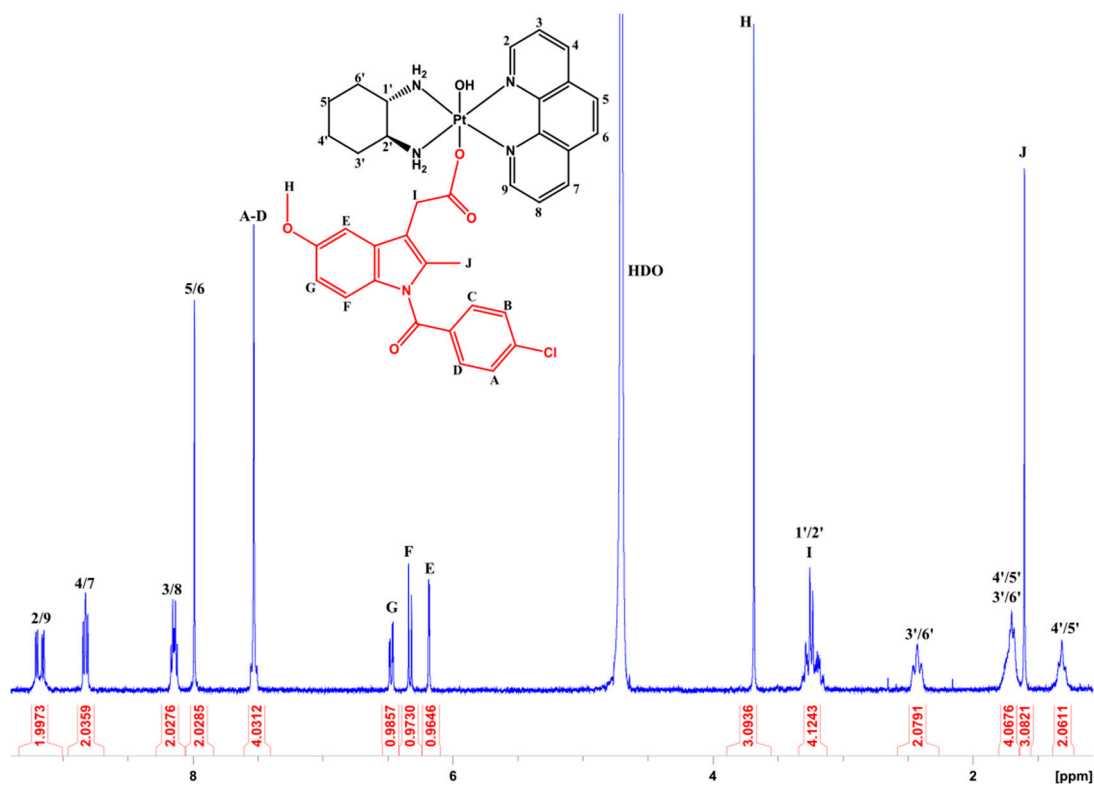

**Figure S6.** The  $^1\text{H}$  NMR spectrum of  $[\text{Pt}(\text{Phen})(\text{SSDACH})(\text{Indomethacin})(\text{OH})](\text{NO}_3)_2$  (**1**) in  $\text{D}_2\text{O}$  at 298 K. Insert: The chemical structure of **1** with assigned numbering.

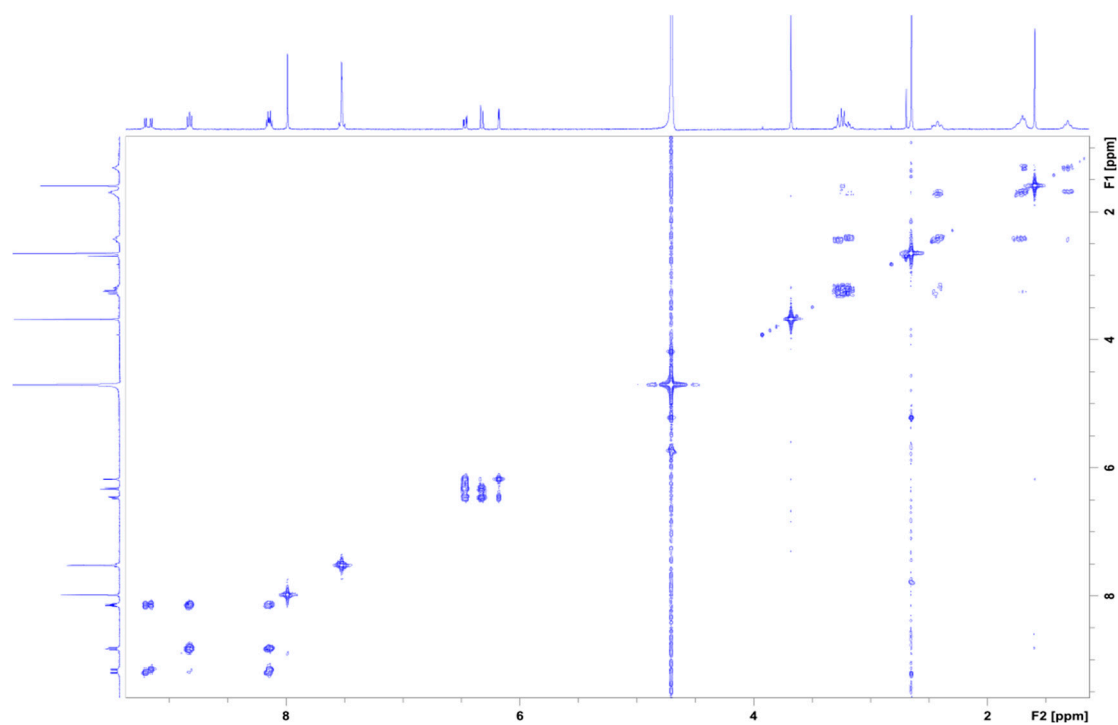

**Figure S7.** The COSY NMR spectrum of  $[\text{Pt}(\text{Phen})(\text{SSDACH})(\text{Indomethacin})(\text{OH})](\text{NO}_3)_2$  (**1**) in  $\text{D}_2\text{O}$  at 298 K.

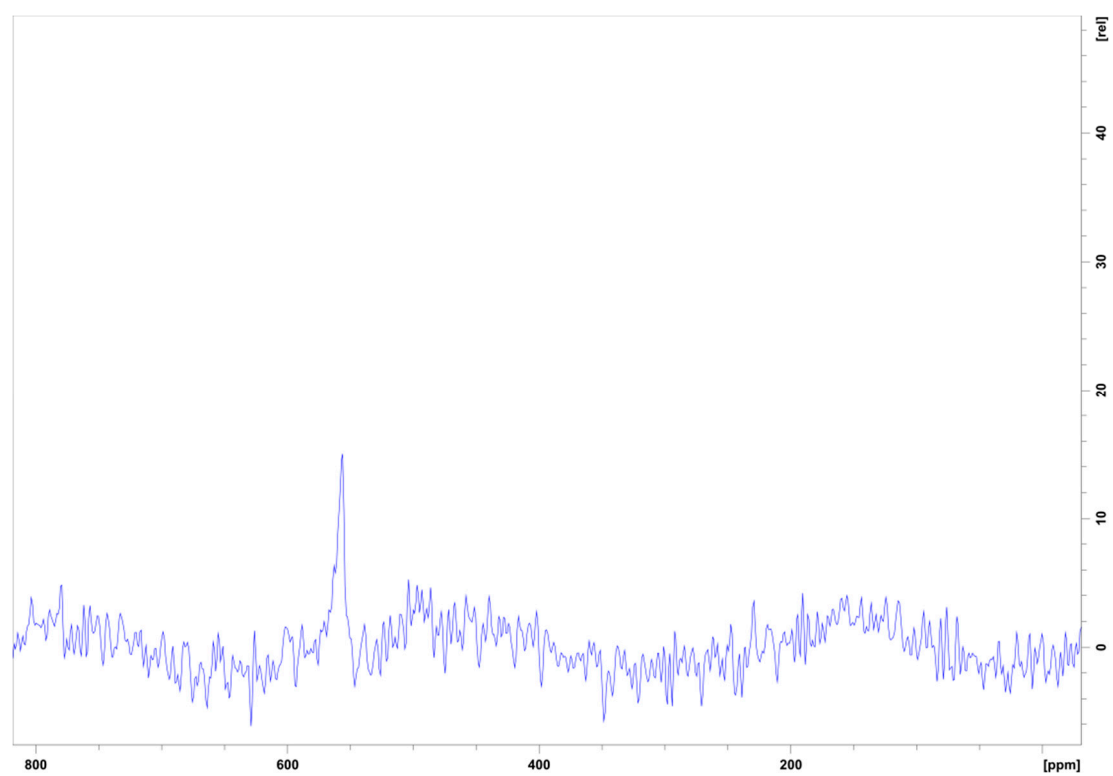

**Figure S8.** The  $^{195}\text{Pt}$  NMR spectrum of  $[\text{Pt}(\text{Phen})(\text{SSDACH})(\text{Indomethacin})(\text{OH})](\text{NO}_3)_2$  (**1**) in  $\text{D}_2\text{O}$  at 298 K, showing a peak at 557 ppm.

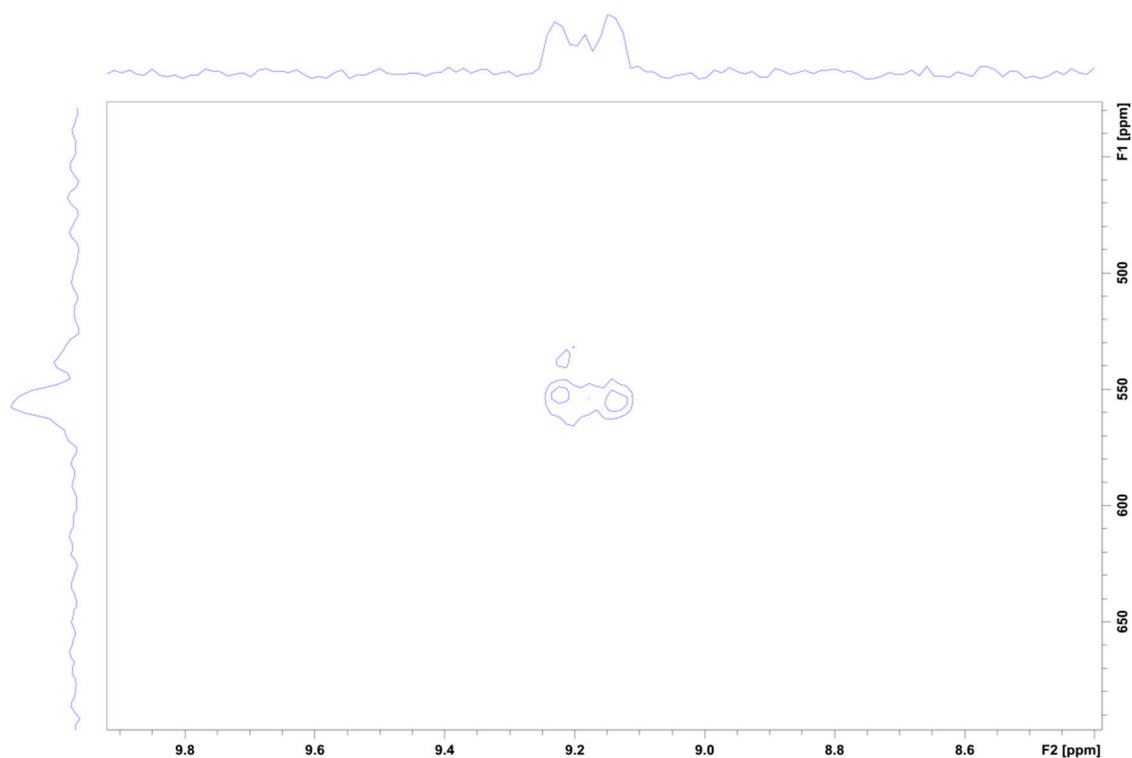

**Figure S9.** The  $^1\text{H}$ - $^{195}\text{Pt}$  HMQC NMR spectrum of  $[\text{Pt}(\text{Phen})(\text{SSDACH})(\text{Indomethacin})(\text{OH})](\text{NO}_3)_2$  (**1**) in  $\text{D}_2\text{O}$  at 298 K.

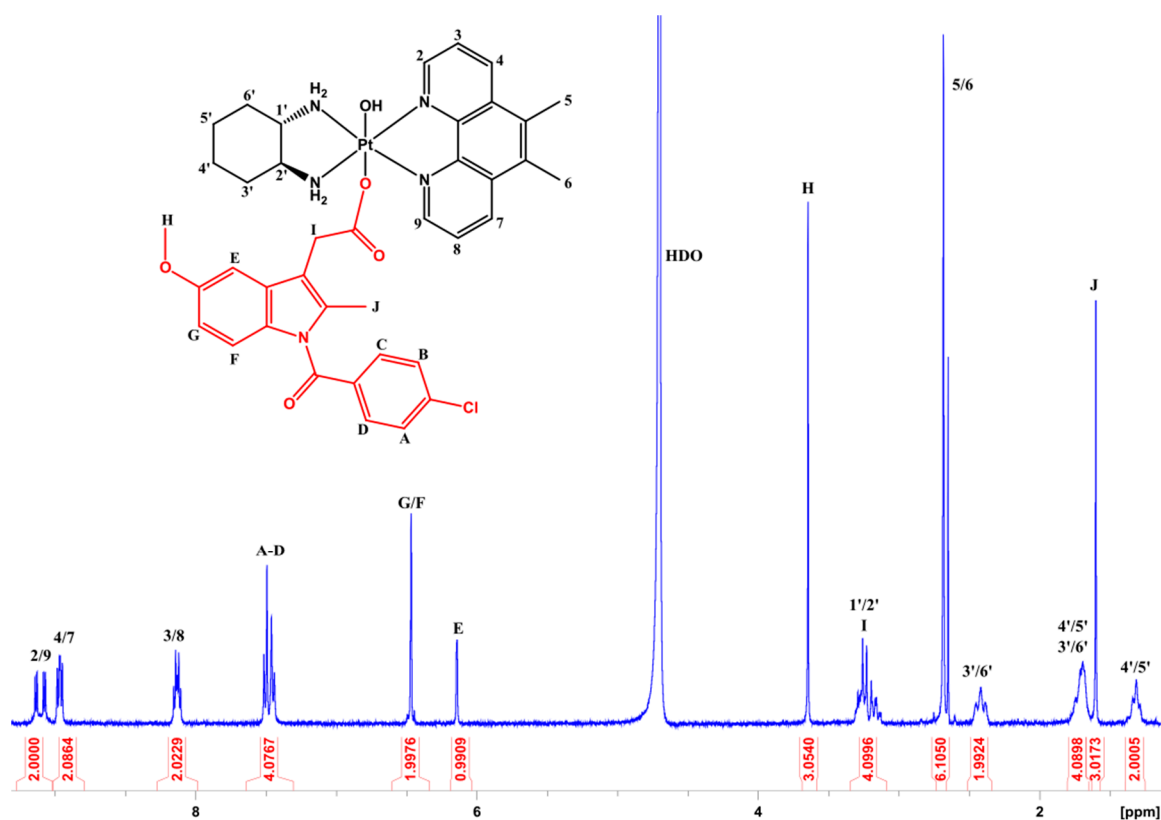

**Figure S10.** The  $^1\text{H}$  NMR spectrum of  $[\text{Pt}(56\text{Me}_2\text{Phen})(\text{SSDACH})(\text{Indomethacin})(\text{OH})](\text{NO}_3)_2$  (**2**) in  $\text{D}_2\text{O}$  at 298 K. Insert: The chemical structure of **2** with assigned numbering.

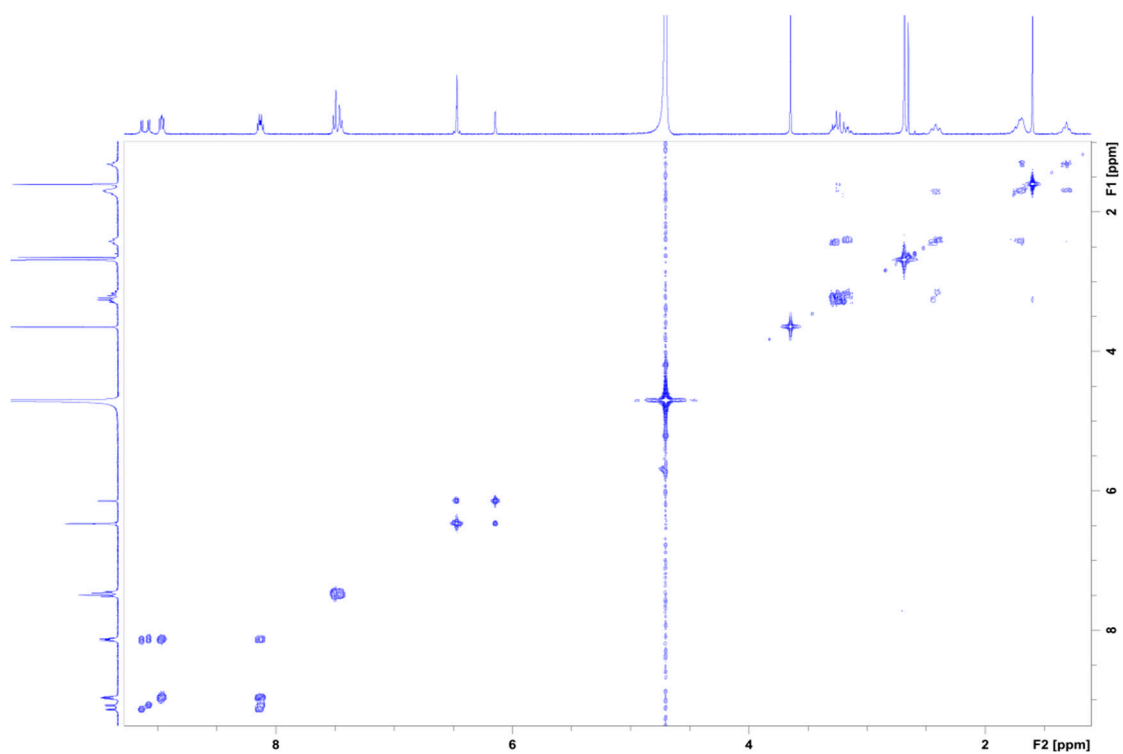

**Figure S11.** The COSY NMR spectrum of  $[\text{Pt}(\text{56Me}_2\text{Phen})(\text{SSDACH})(\text{Indomethacin})(\text{OH})](\text{NO}_3)_2$  (**2**) in  $\text{D}_2\text{O}$  at 298 K.

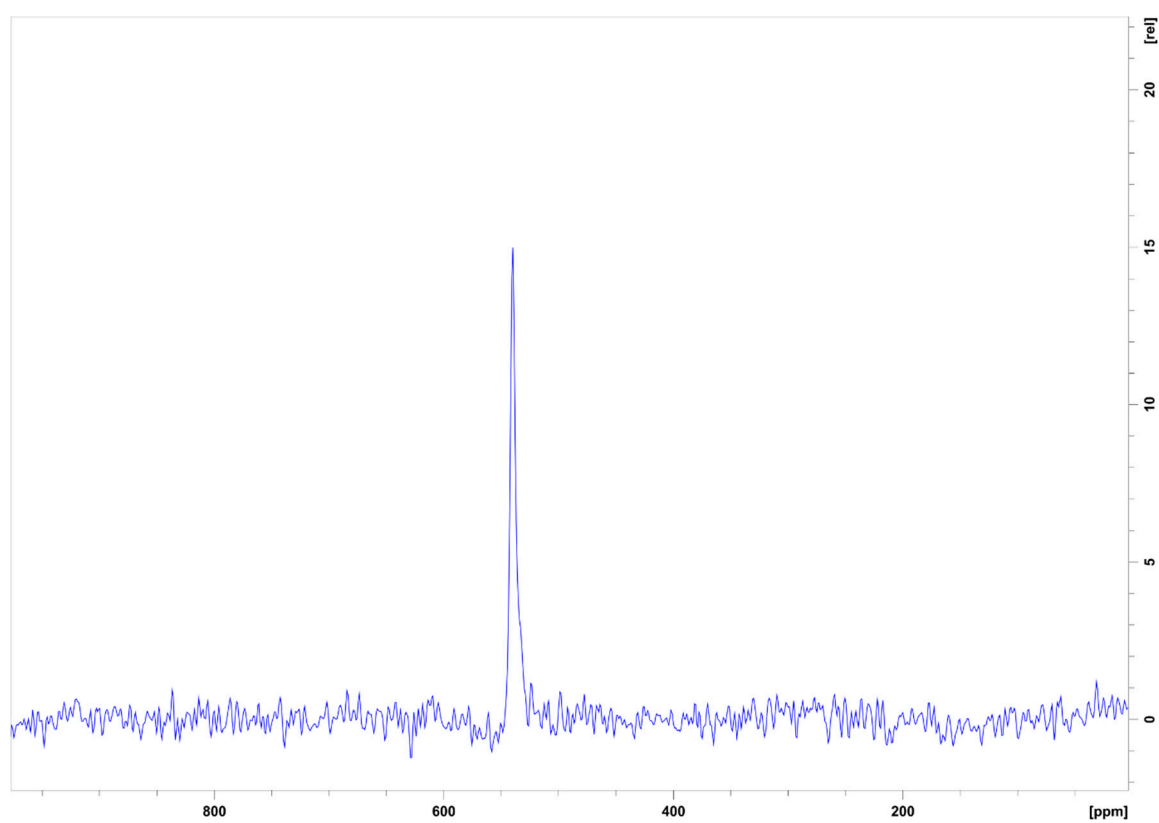

**Figure S12.** The  $^{195}\text{Pt}$  NMR spectrum of  $[\text{Pt}(\text{56Me}_2\text{Phen})(\text{SSDACH})(\text{Indomethacin})(\text{OH})](\text{NO}_3)_2$  (**2**) in  $\text{D}_2\text{O}$  at 298 K, showing a peak at 540 ppm.

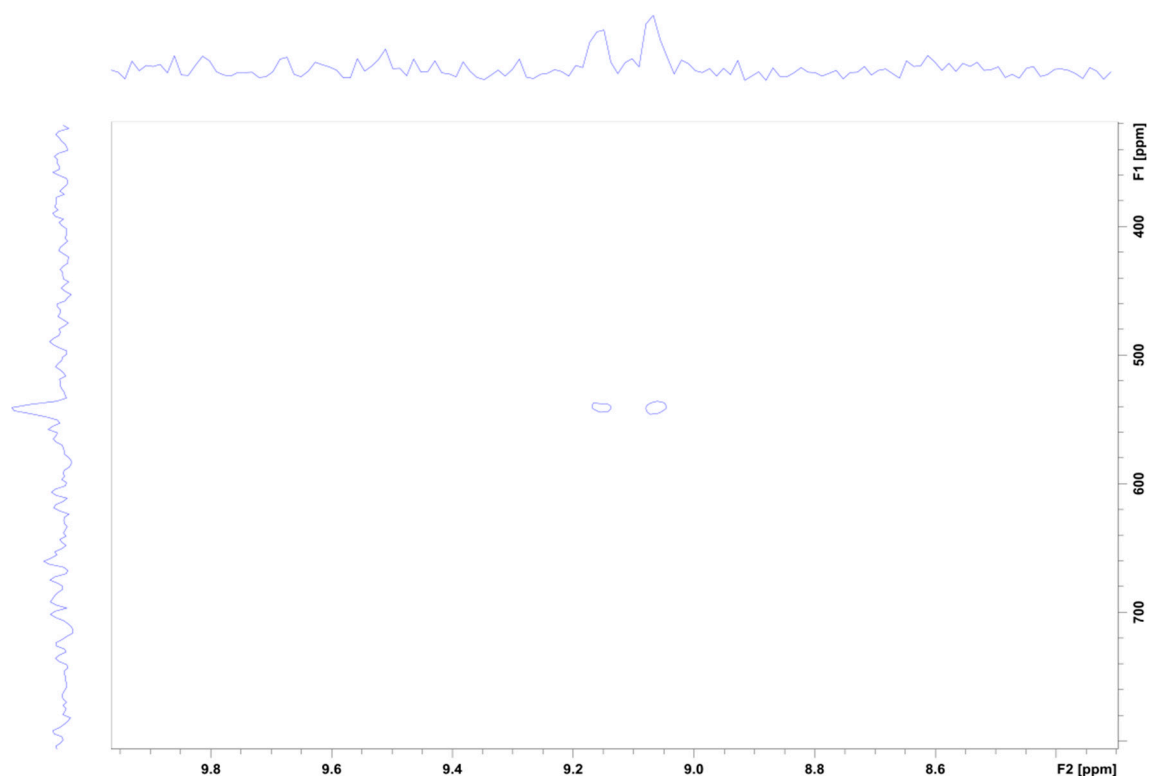

**Figure S13.** The  $^1\text{H}$ - $^{195}\text{Pt}$  HMQC NMR spectrum of  $[\text{Pt}(56\text{Me}_2\text{Phen})(\text{SSDACH})(\text{Indomethacin})(\text{OH})](\text{NO}_3)_2$  (**2**) in  $\text{D}_2\text{O}$  at 298 K.

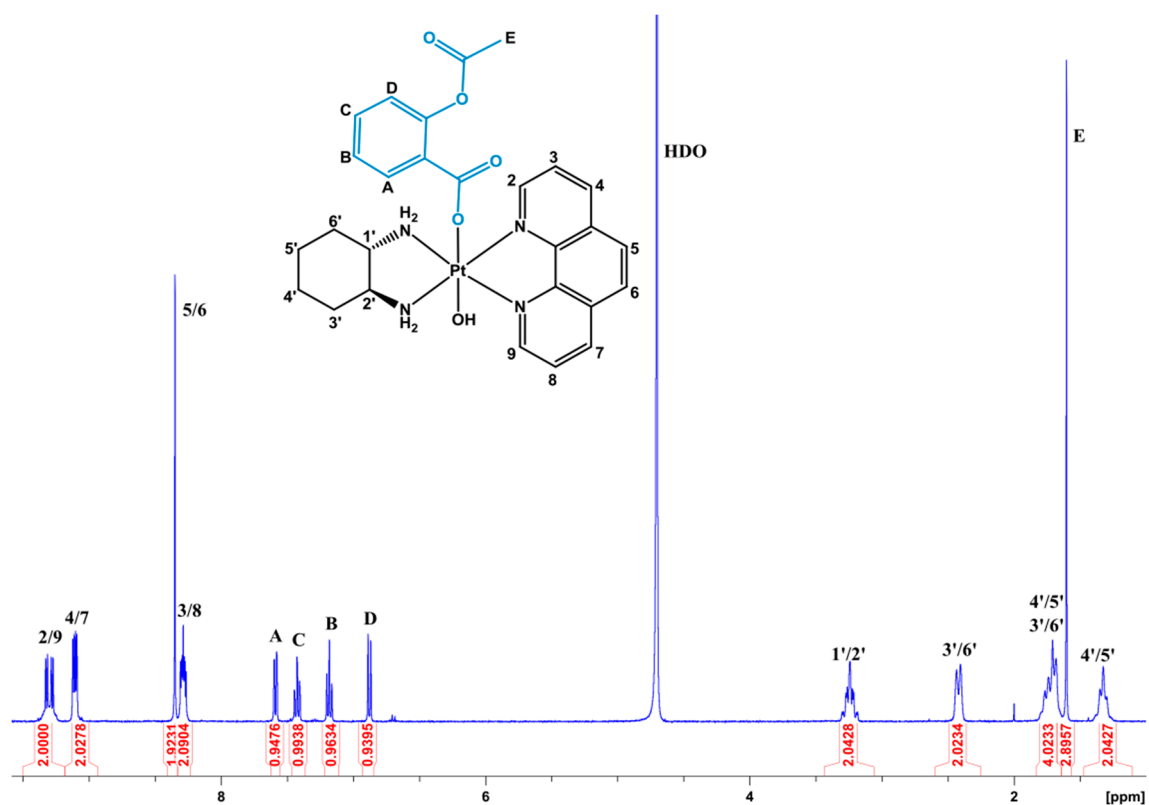

**Figure S14.** The  $^1\text{H}$  NMR spectrum of  $[\text{Pt}(\text{Phen})(\text{SSDACH})(\text{Aspirin})(\text{OH})](\text{NO}_3)_2$  (**3**) in  $\text{D}_2\text{O}$  at 298 K. Insert: The chemical structure of **3** with assigned numbering.



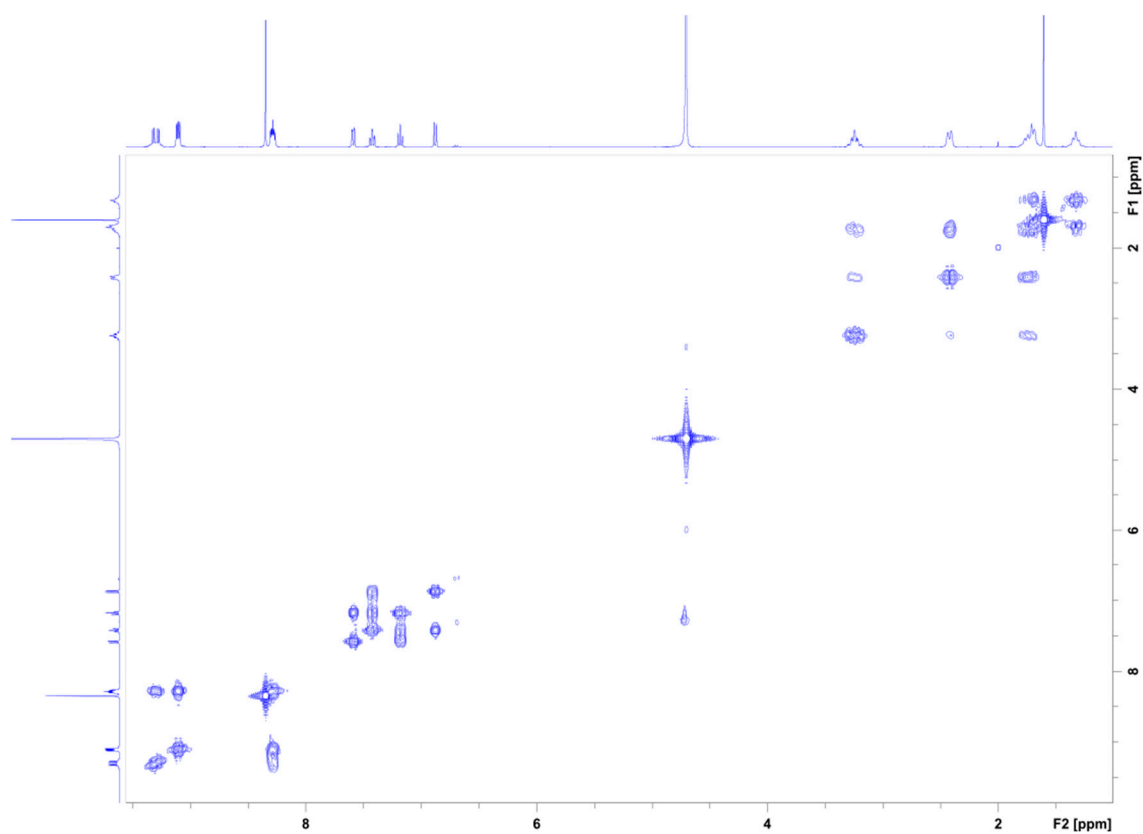

**Figure S15.** The COSY NMR spectrum of  $[\text{Pt}(\text{Phen})(\text{SSDACH})(\text{Aspirin})(\text{OH})](\text{NO}_3)_2$  (**3**) in  $\text{D}_2\text{O}$  at 298 K.

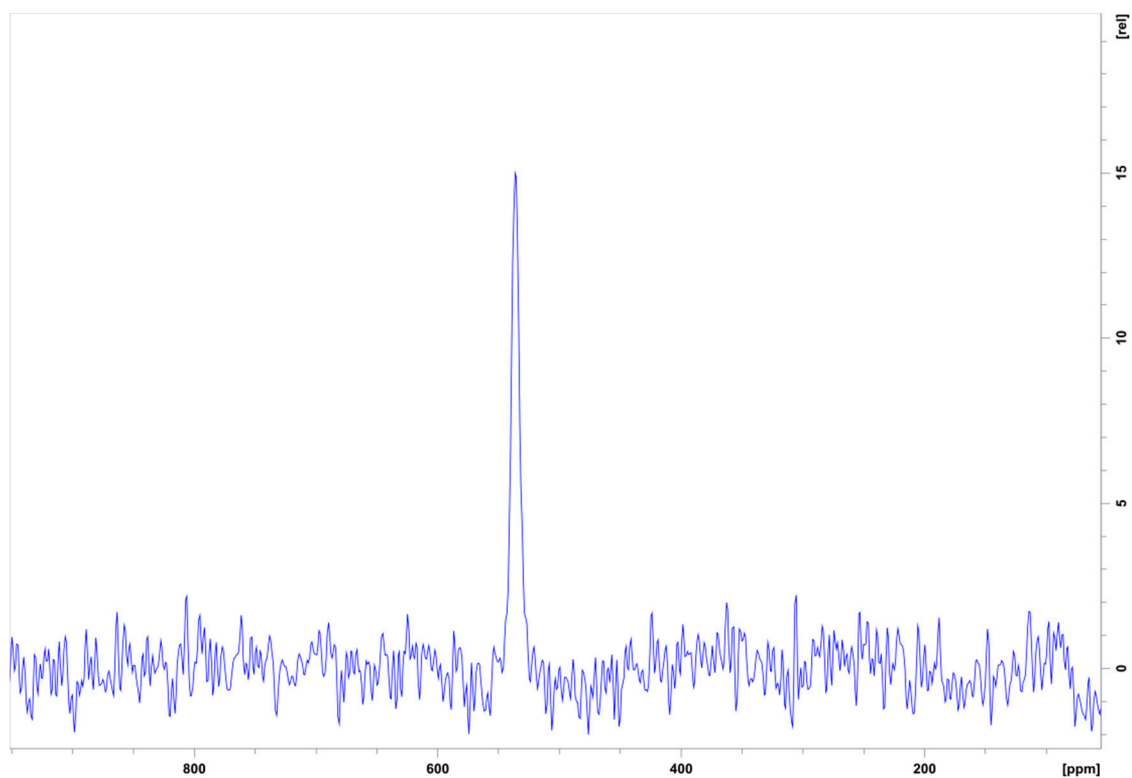

**Figure S16.** The  $^{195}\text{Pt}$  NMR spectrum of  $[\text{Pt}(\text{Phen})(\text{SSDACH})(\text{Aspirin})(\text{OH})](\text{NO}_3)_2$  (**3**) in  $\text{D}_2\text{O}$  at 298 K, showing a peak at 536 ppm.

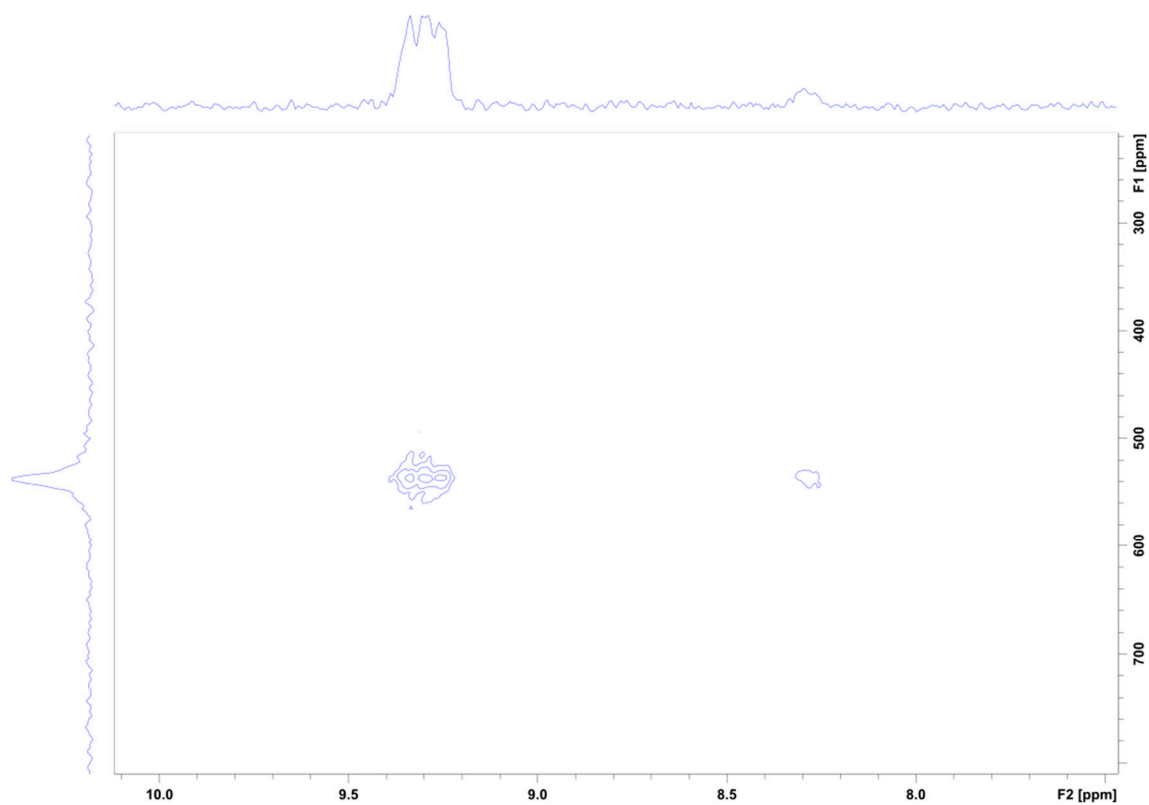

**Figure S17.** The  $^1\text{H}$ - $^{195}\text{Pt}$  HMQC NMR spectrum of  $[\text{Pt}(\text{Phen})(\text{SSDACH})(\text{Aspirin})(\text{OH})](\text{NO}_3)_2$  (**3**) in  $\text{D}_2\text{O}$  at 298 K.

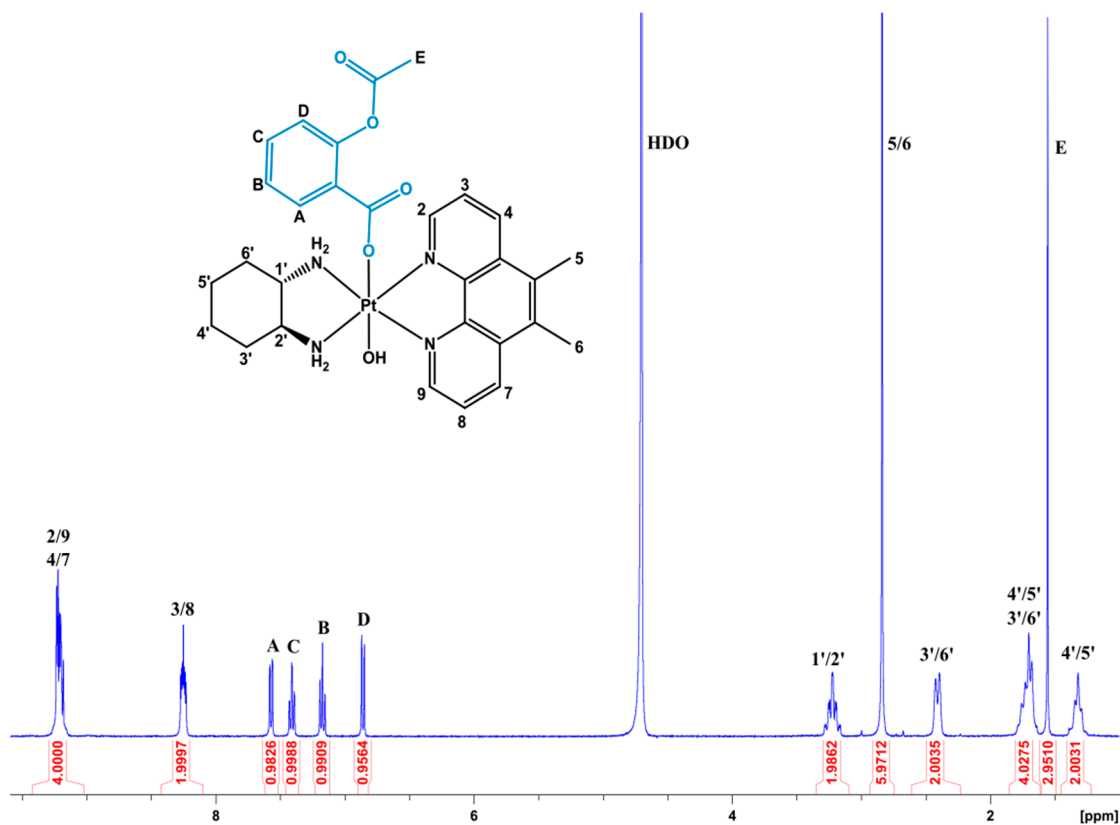

**Figure S18.** The  $^1\text{H}$  NMR spectrum of  $[\text{Pt}(56\text{Me}_2\text{Phen})(\text{SSDACH})(\text{Aspirin})(\text{OH})](\text{NO}_3)_2$  (**4**) in  $\text{D}_2\text{O}$  at 298 K. Insert: The chemical structure of **4** with assigned numbering.

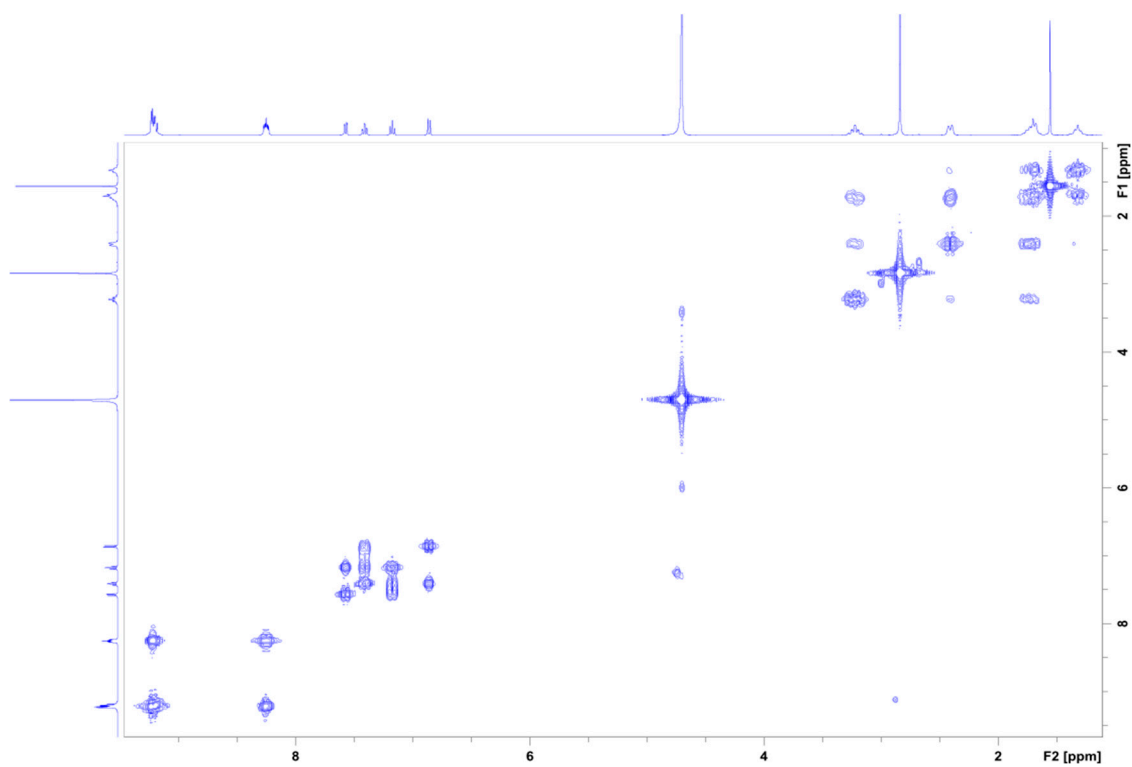

**Figure S19.** The COSY NMR spectrum of  $[\text{Pt}(\text{56Me}_2\text{Phen})(\text{SSDACH})(\text{Aspirin})(\text{OH})](\text{NO}_3)_2$  (**4**) in  $\text{D}_2\text{O}$  at 298 K.

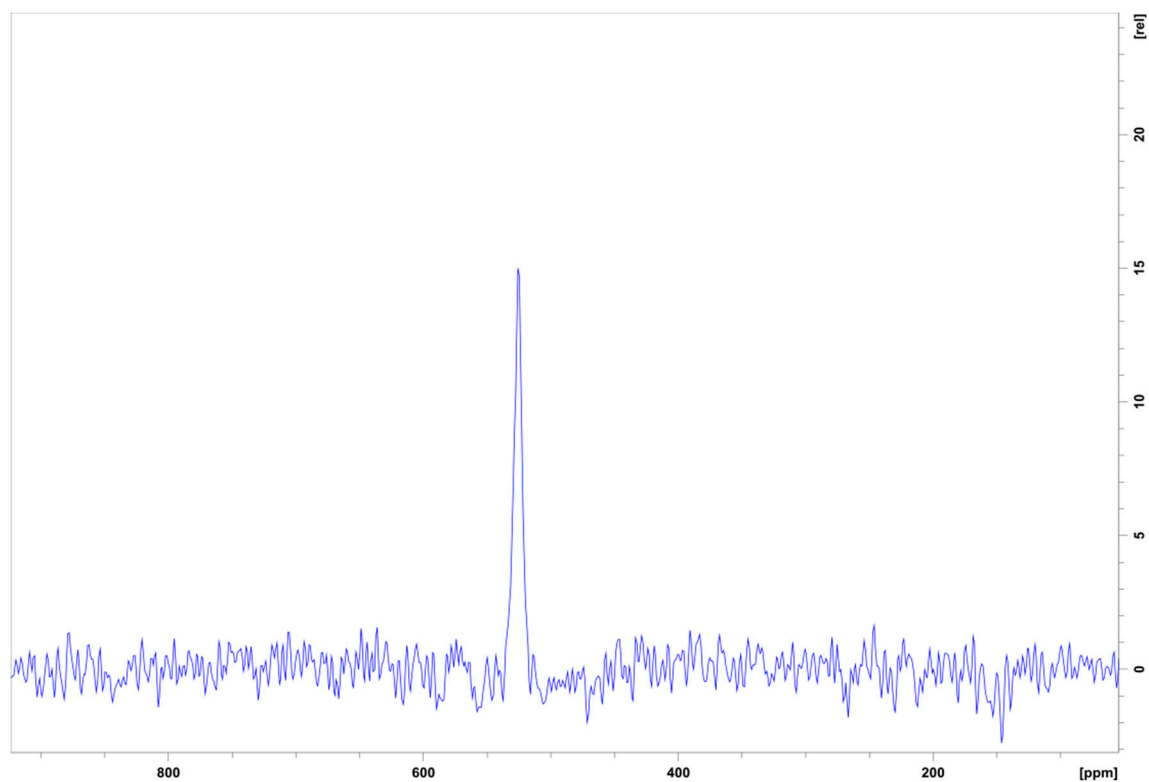

**Figure S20.** The  $^{195}\text{Pt}$  NMR spectrum of  $[\text{Pt}(\text{56Me}_2\text{Phen})(\text{SSDACH})(\text{Aspirin})(\text{OH})](\text{NO}_3)_2$  (**4**) in  $\text{D}_2\text{O}$  at 298 K, showing a peak at 525 ppm.

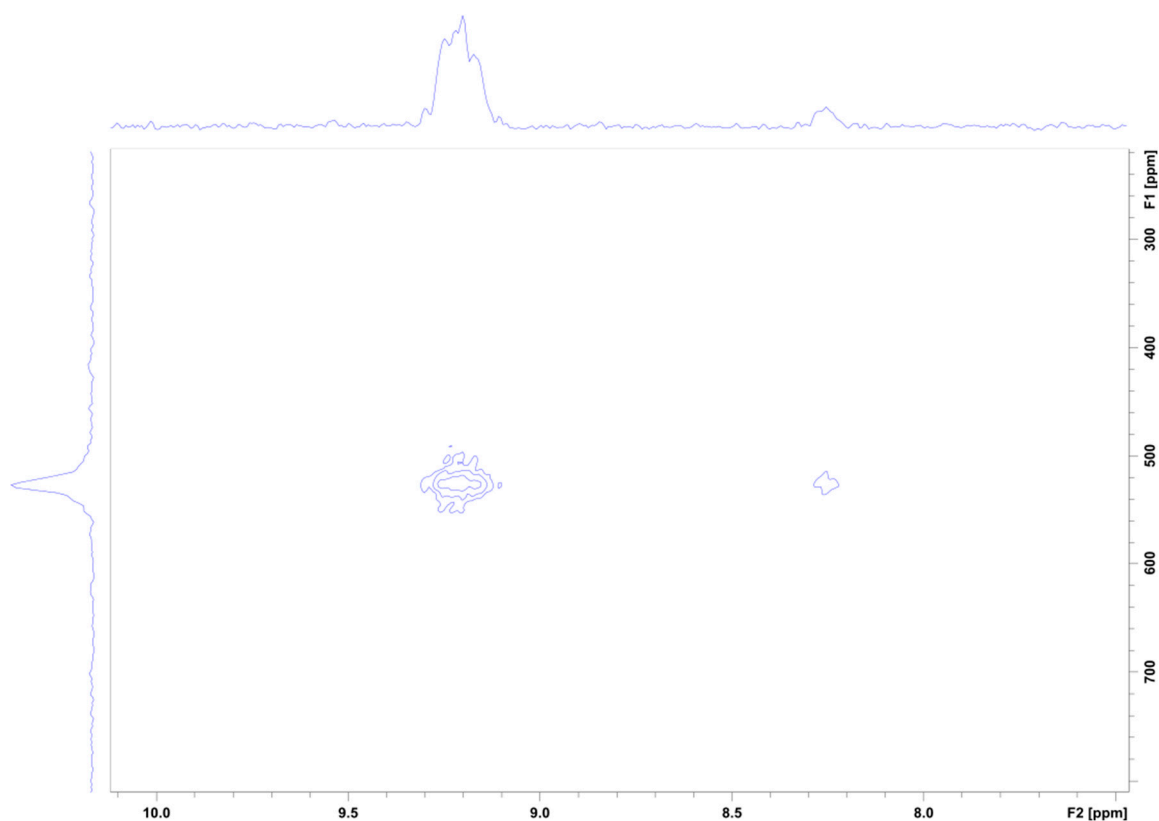

**Figure S21.** The  $^1\text{H}$ - $^{195}\text{Pt}$  HMQC NMR spectrum of  $[\text{Pt}(56\text{Me}_2\text{Phen})(\text{SSDACH})(\text{Aspirin})(\text{OH})](\text{NO}_3)_2$  (**4**) in  $\text{D}_2\text{O}$  at 298 K.

#### 4. HPLC

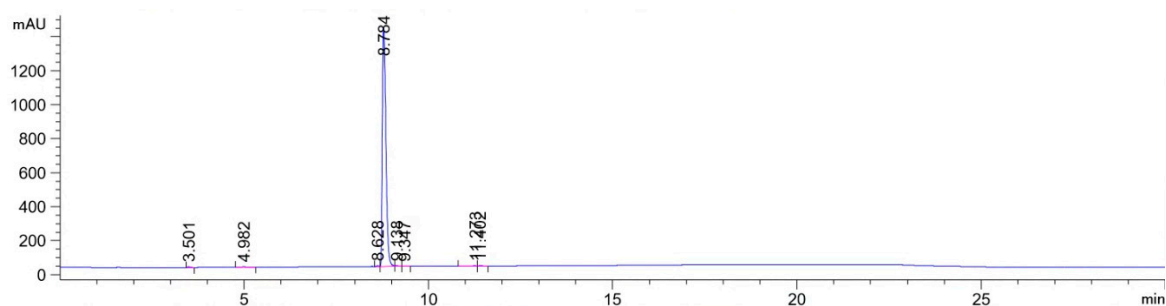

**Figure S22.** The HPLC chromatogram of  $[\text{Pt}(\text{Phen})(\text{SSDACH})(\text{Indomethacin})(\text{OH})](\text{NO}_3)_2$  (**1**), at 254 nm, at a gradient of 0–100% (ACN: $\text{H}_2\text{O}$ , 9:1) over 15 min.

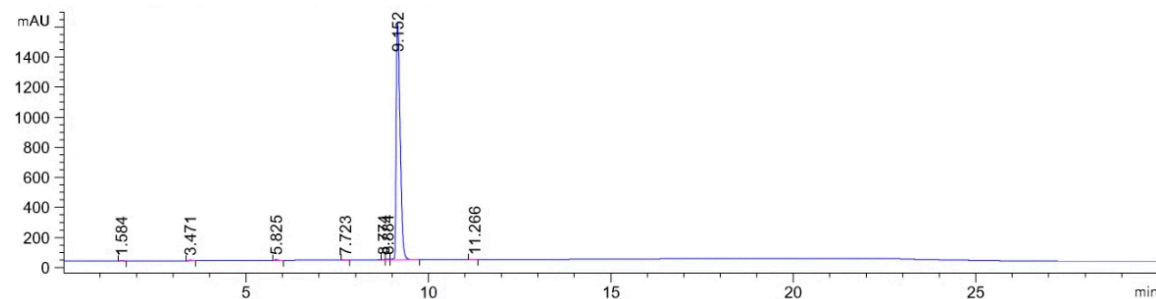

**Figure S23.** The HPLC chromatogram of  $[\text{Pt}(56\text{Me}_2\text{Phen})(\text{SSDACH})(\text{Indomethacin})(\text{OH})](\text{NO}_3)_2$  (**2**), at 254 nm, at a gradient of 0–100% (ACN: $\text{H}_2\text{O}$ , 9:1) over 15 min.

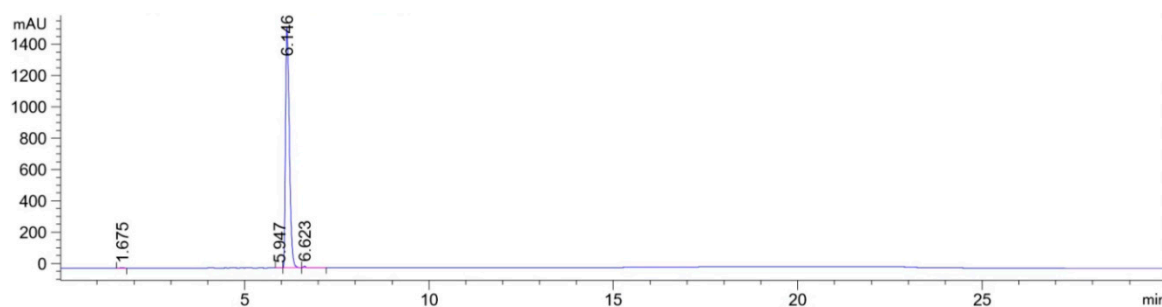

**Figure S24.** The HPLC chromatogram of [Pt(Phen)(SSDACH)(Aspirin)(OH)](NO<sub>3</sub>)<sub>2</sub> (**3**), at 254 nm, at a gradient of 0–100% (ACN:H<sub>2</sub>O, 9:1) over 15 min.

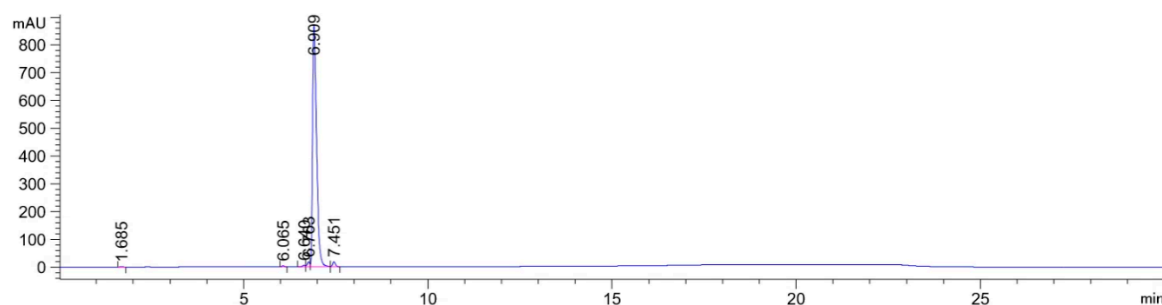

**Figure S25.** The HPLC chromatogram of [Pt(56Me<sub>2</sub>Phen)(SSDACH)(Aspirin)(OH)](NO<sub>3</sub>)<sub>2</sub> (**4**), at 254 nm, at a gradient of 0–100% (ACN:H<sub>2</sub>O, 9:1) over 15 min.

## 5. ESI-MS

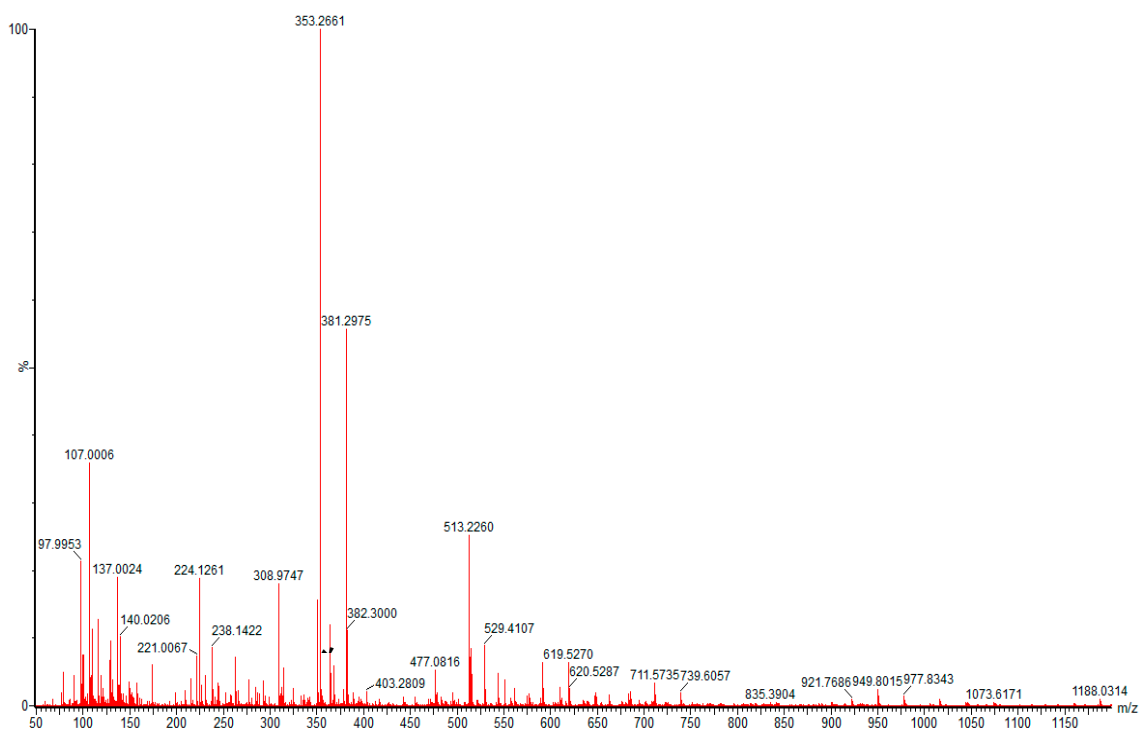

**Figure S26.** Full ESI-MS spectrum of Indomethacin-NHS ester. Below: The expanded region of the [M+Na]<sup>+</sup> peak.

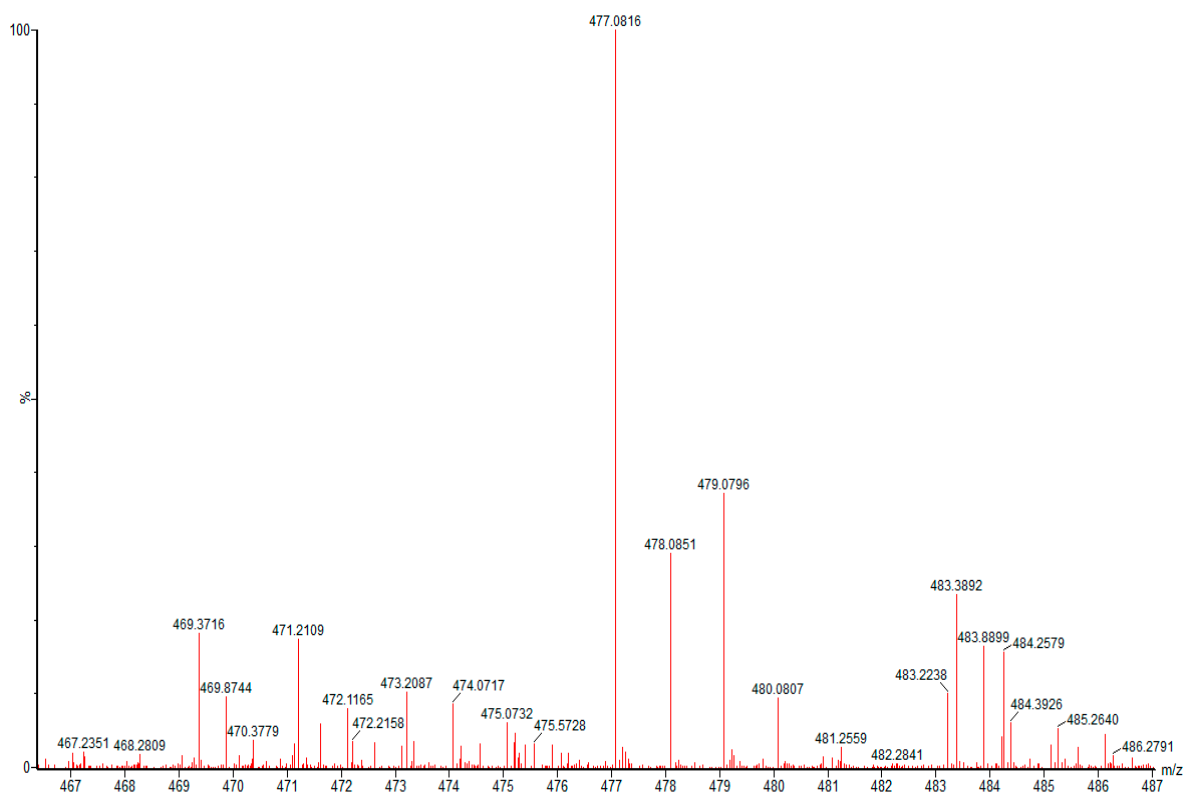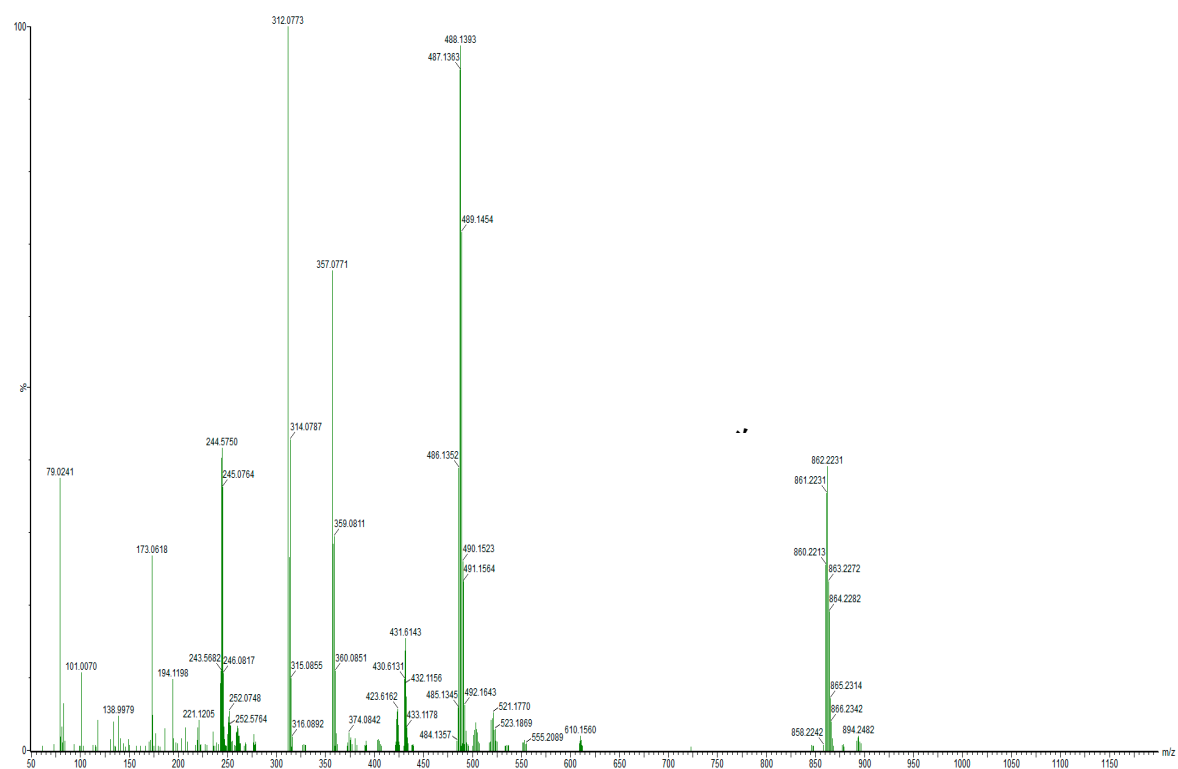

**Figure S27.** Full ESI-MS spectrum of [Pt(Phen)(SSDACH)(Indomethacin)(OH)](NO<sub>3</sub>)<sub>2</sub> (1). Below: The expanded region of the [M]<sup>+</sup> peak.

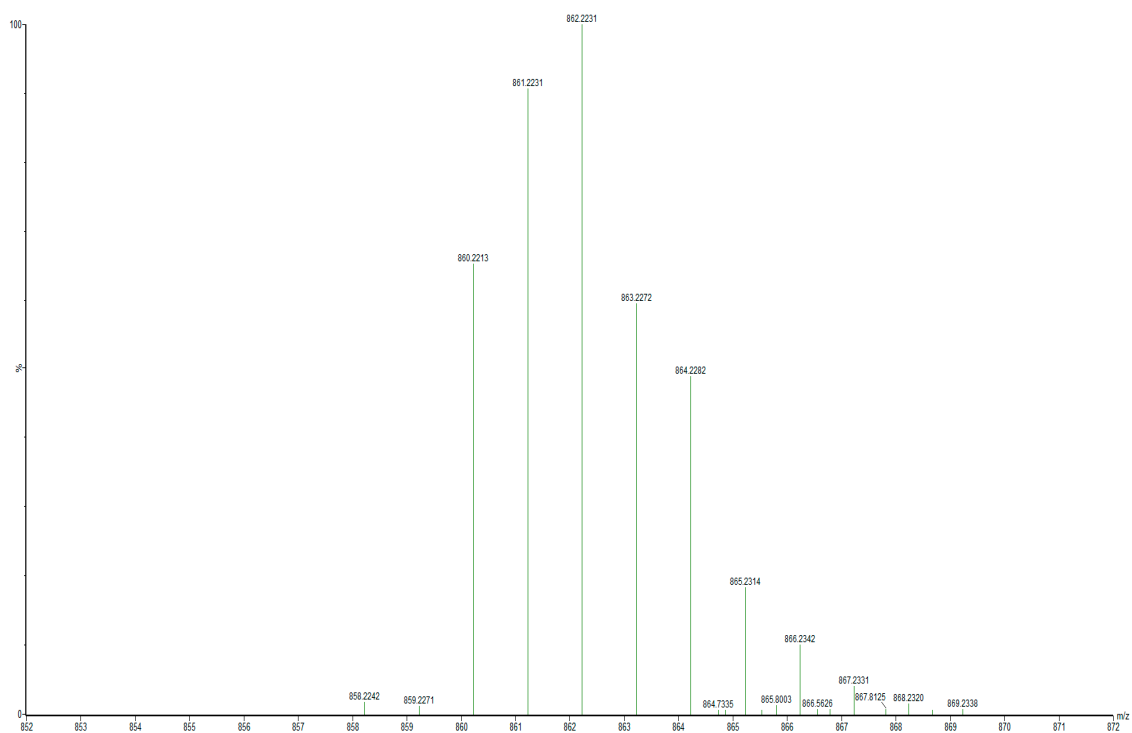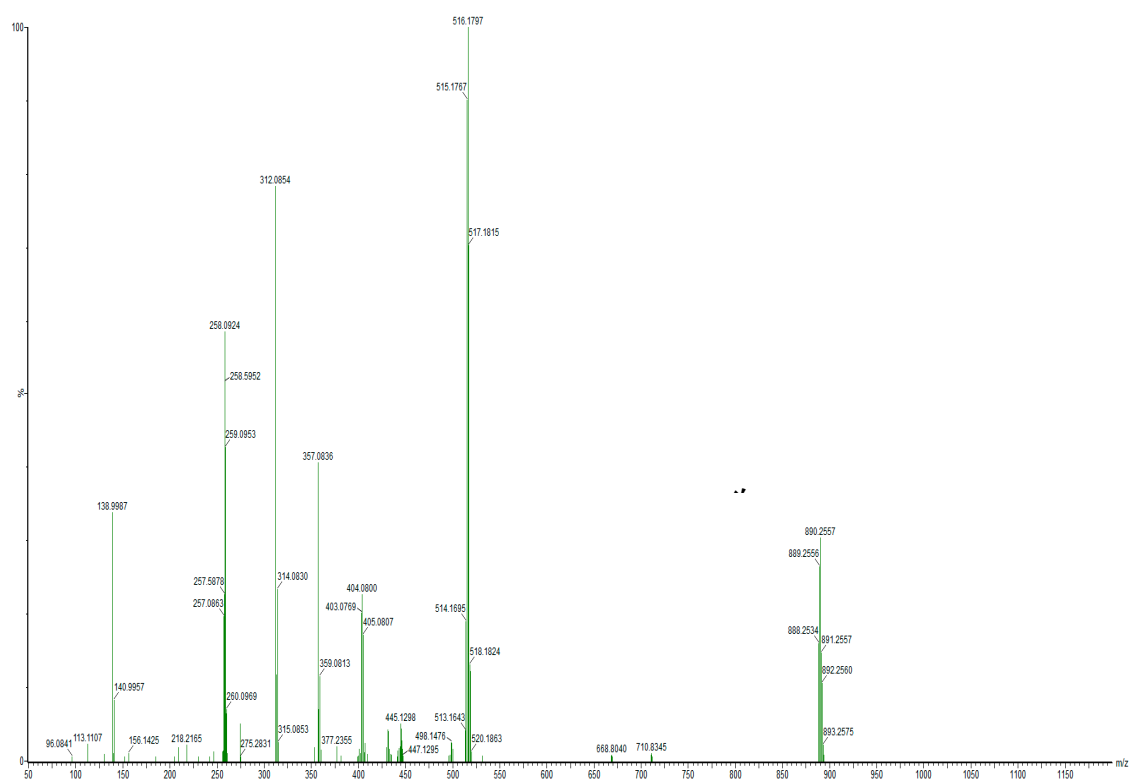

**Figure S28.** Full ESI-MS spectrum of [Pt(56Me<sub>2</sub>Phen)(SSDACH)(Indomethacin)(OH)](NO<sub>3</sub>)<sub>2</sub> (**2**). Below: The expanded region of the [M]<sup>+</sup> peak.

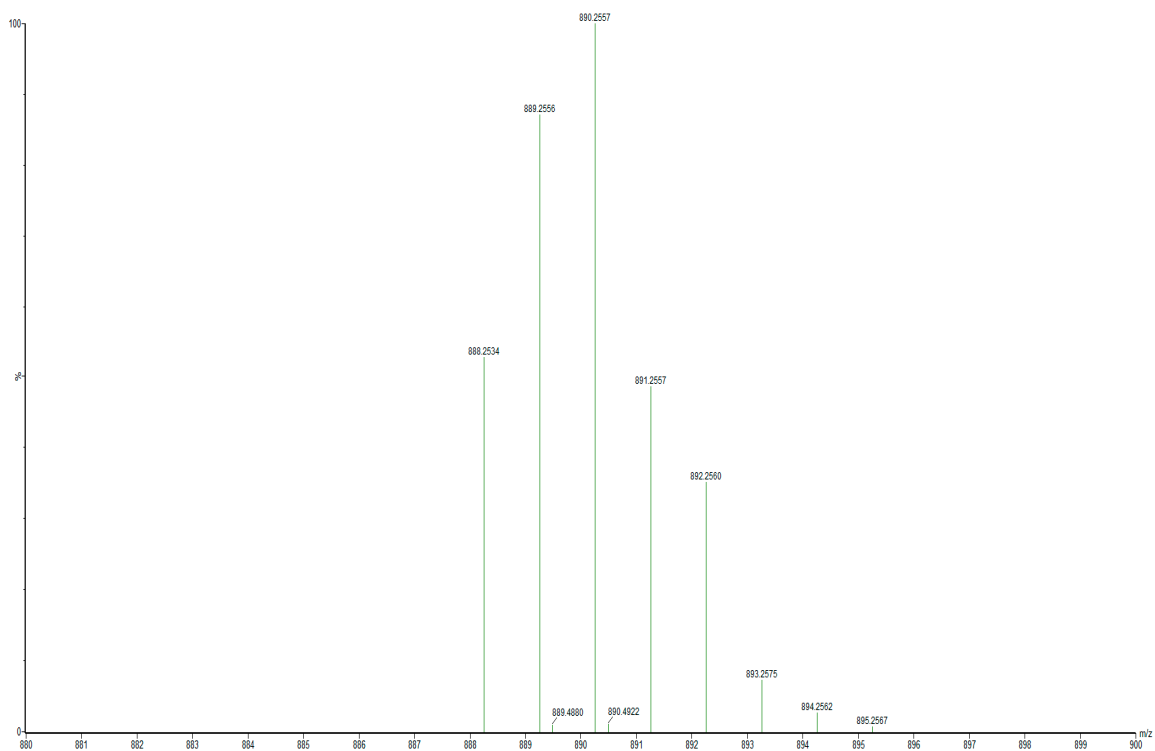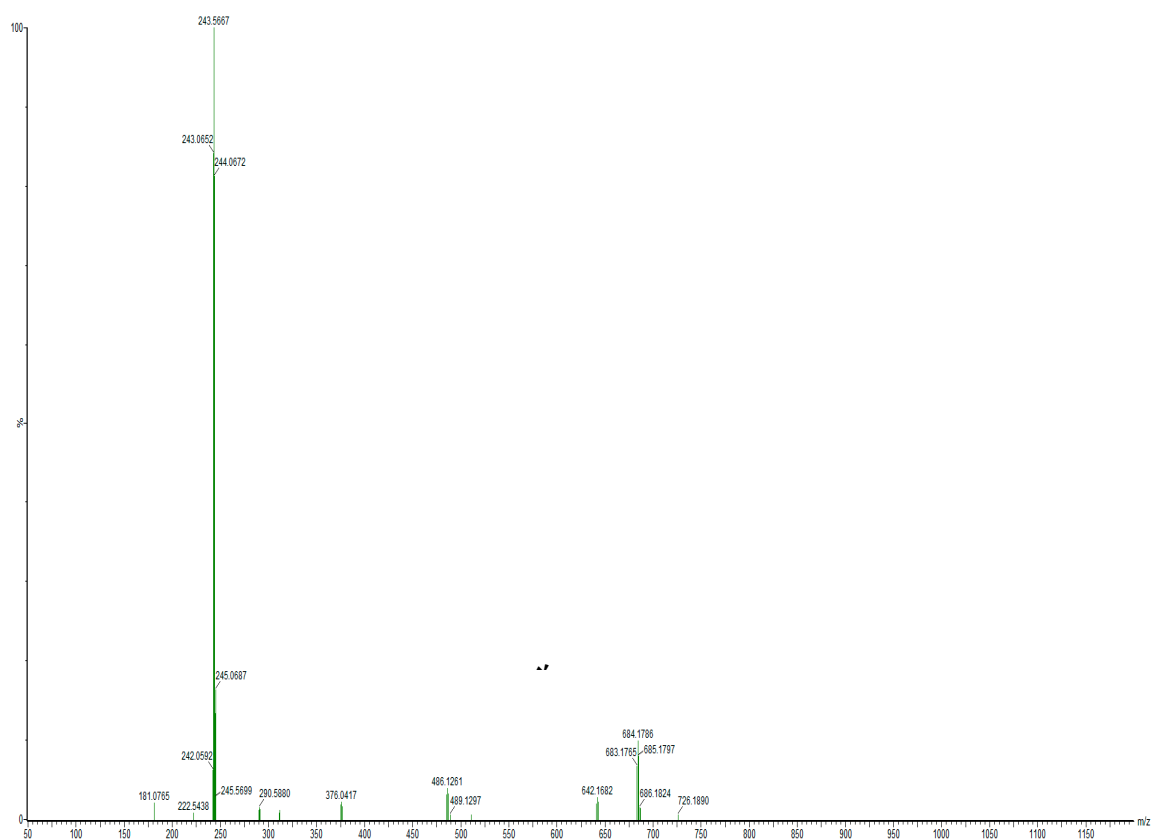

**Figure S29.** Full ESI-MS spectrum of  $[\text{Pt}(\text{Phen})(\text{SSDACH})(\text{Aspirin})(\text{OH})](\text{NO}_3)_2$  (**3**). Below: The expanded region of the  $[\text{M}-\text{H}]^+$  peak.



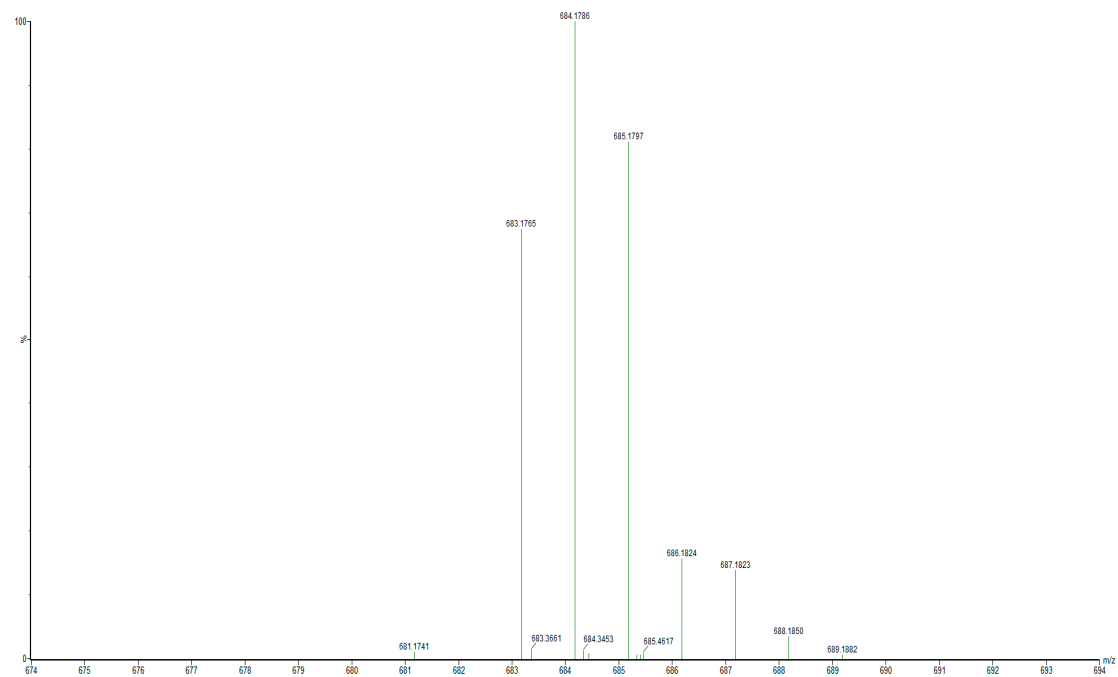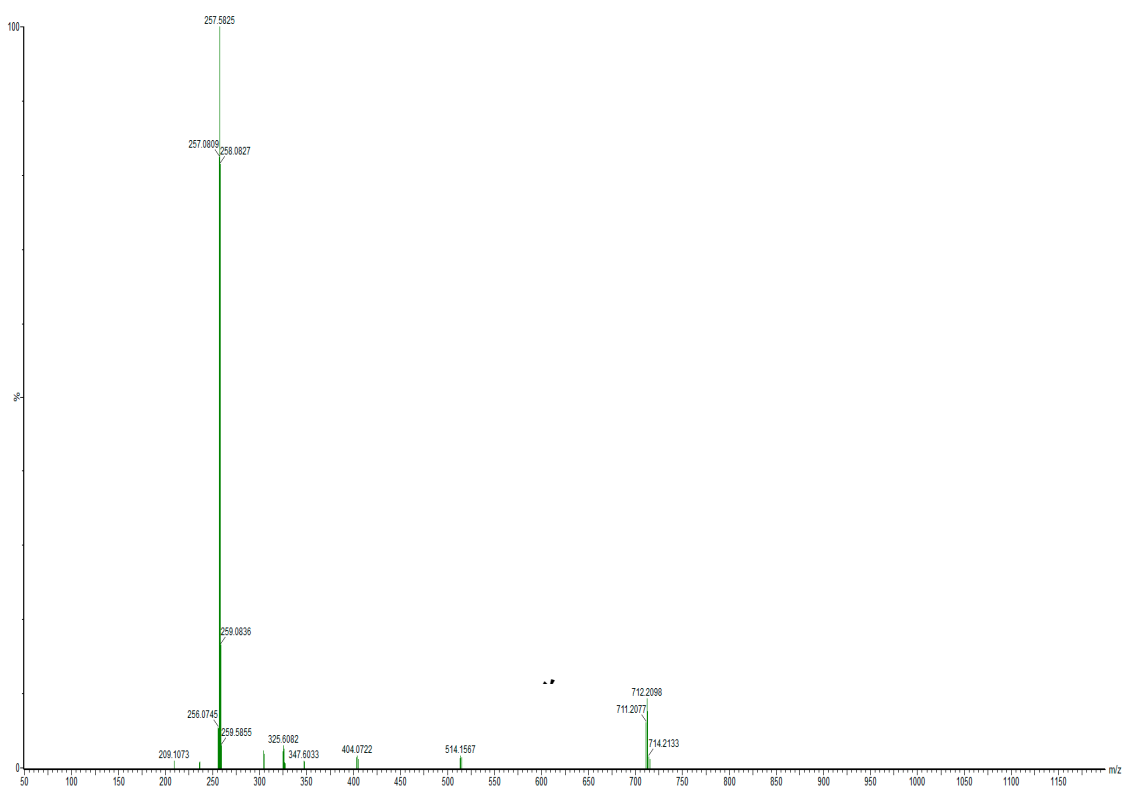

**Figure S30.** Full ESI-MS spectrum of [Pt(56Me<sub>2</sub>Phen)(SSDACH)(Aspirin)(OH)](NO<sub>3</sub>)<sub>2</sub> (**4**). Below: The expanded region of the [M-H]<sup>+</sup> peak.

## 6. Summary of Characterisation Data

Table S3. Summary of characterisation data for 1–4.

| Complex | Molecular Formula                                                   | Yield (%) | HRMS-ESI Calc. (found)                         | Electronic spectrum $\lambda_{\max}$ nm ( $\epsilon/\text{M}^{-1} \text{cm}^{-1}$ ) | CD $\lambda_{\max}$ nm (mdeg mol L <sup>-1</sup> ) | HPLC purity (%) |
|---------|---------------------------------------------------------------------|-----------|------------------------------------------------|-------------------------------------------------------------------------------------|----------------------------------------------------|-----------------|
| 1       | C <sub>37</sub> H <sub>38</sub> ClN <sub>7</sub> O <sub>11</sub> Pt | 65        | [M] <sup>+</sup> $m/z$ = 862.2209 (862.2231)   | 201 (161,400 ± 430), 276 (50,000 ± 115), 303 (16,650 ± 120)                         | 206 (-2.8), 267 (0.3), 290 (-0.4)                  | 98.8            |
| 2       | C <sub>39</sub> H <sub>42</sub> ClN <sub>7</sub> O <sub>11</sub> Pt | 63        | [M] <sup>+</sup> $m/z$ = 890.2522 (890.2557)   | 202 (193,500 ± 215), 282 (51,600 ± 145), 313 (19,900 ± 245)                         | 210 (-2.9), 242 (-1.2), 274 (0.7), 295 (-0.9)      | 99.1            |
| 3       | C <sub>27</sub> H <sub>30</sub> N <sub>6</sub> O <sub>11</sub> Pt   | 69        | [M-H] <sup>+</sup> $m/z$ = 684.1786 (684.1786) | 202 (94,900 ± 295), 279 (28,900 ± 75), 306 (8050 ± 40)                              | 215 (-2.3)                                         | 99.3            |
| 4       | C <sub>29</sub> H <sub>34</sub> N <sub>6</sub> O <sub>11</sub> Pt   | 67        | [M-H] <sup>+</sup> $m/z$ = 712.2099 (712.2098) | 200 (108,200 ± 330), 291 (32,200 ± 105), 317 (7850 ± 25)                            | 216 (-2.1)                                         | 96.8            |

## 7. UV Spectra

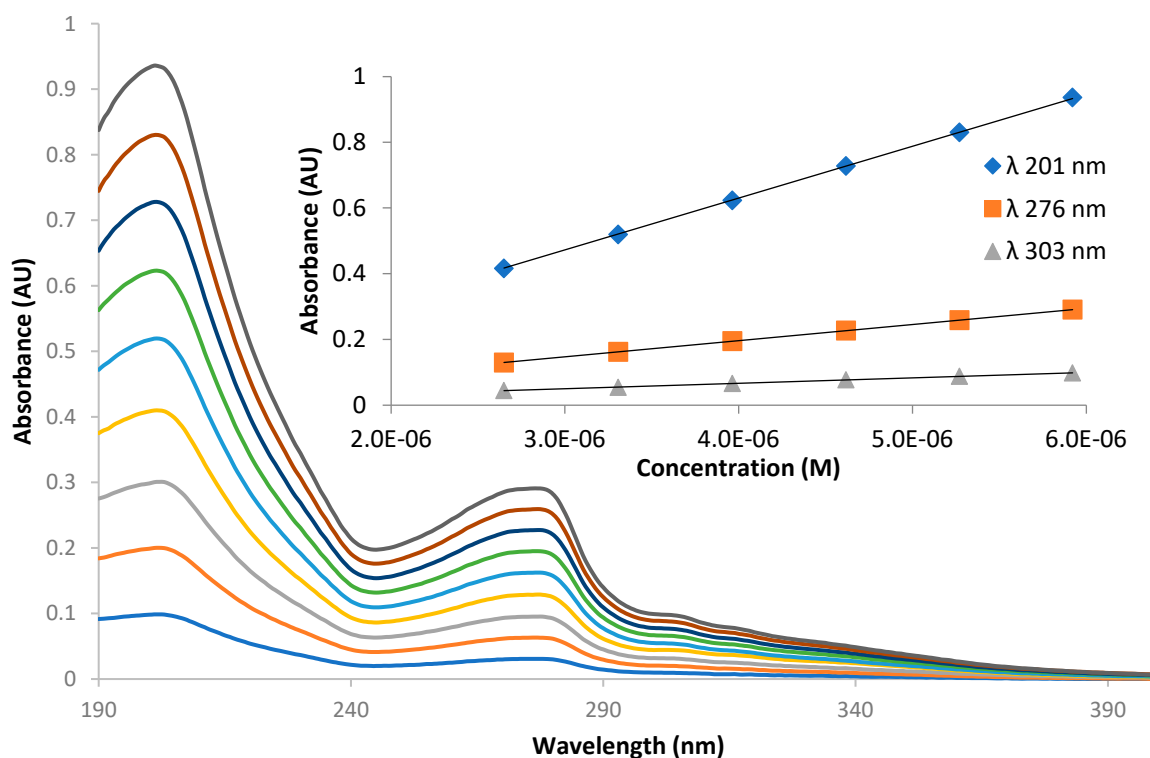

Figure S31. The UV spectrum of a replicate of [Pt(Phen)(SSDACH)(Indomethacin)(OH)](NO<sub>3</sub>)<sub>2</sub> (1) in water.

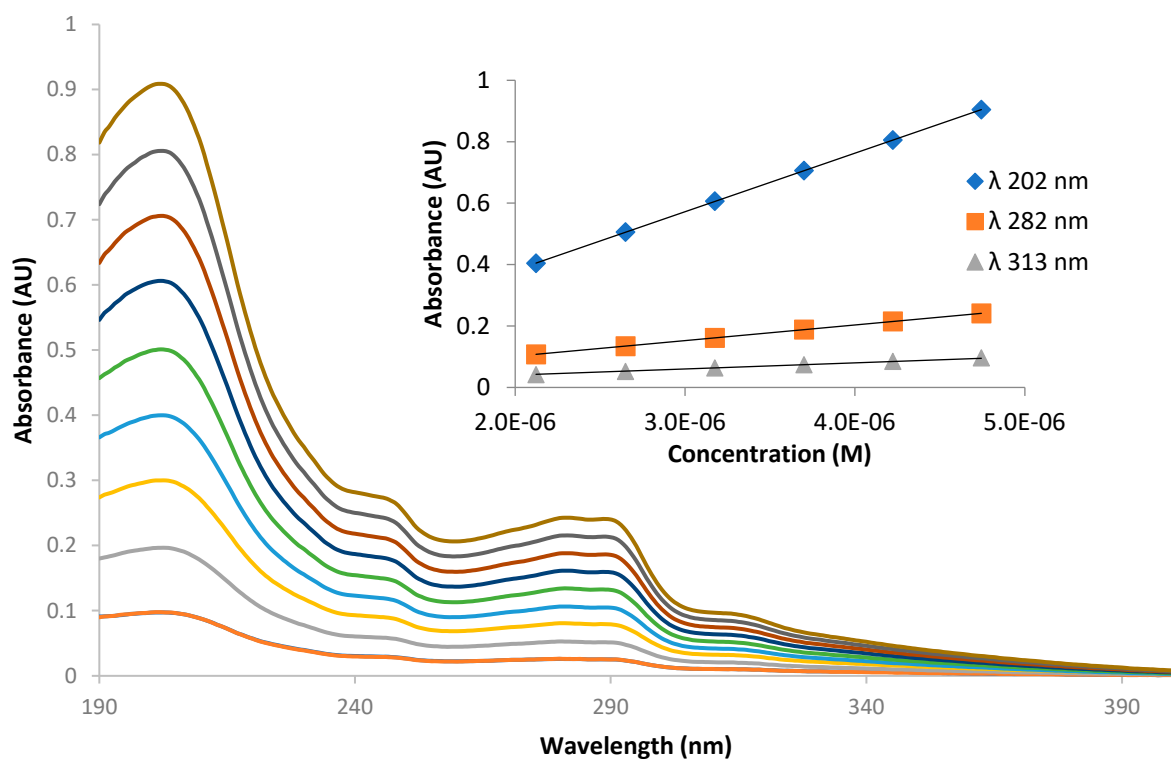

**Figure S32.** The UV spectrum of a replicate of  $[\text{Pt}(\text{56Me}_2\text{Phen})(\text{SSDACH})(\text{Indomethacin})(\text{OH})](\text{NO}_3)_2$  (2) in water.

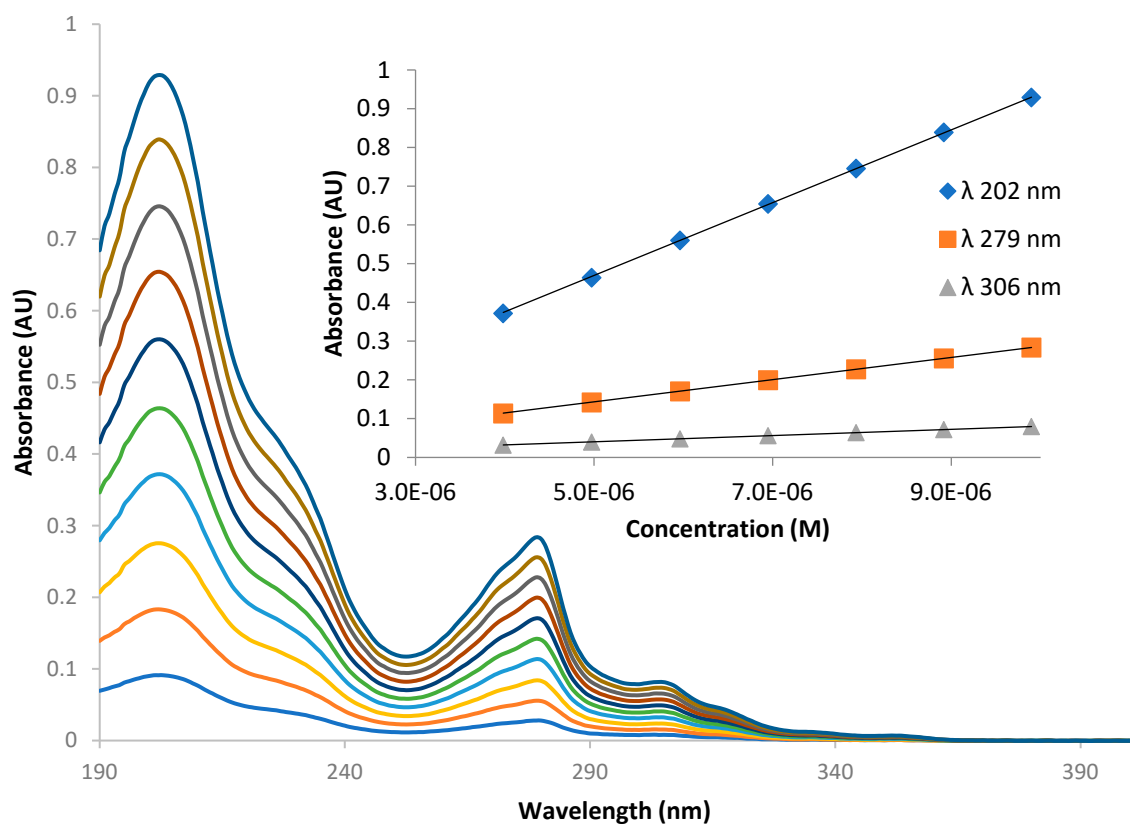

**Figure S33.** The UV spectrum of a replicate of  $[\text{Pt}(\text{Phen})(\text{SSDACH})(\text{Aspirin})(\text{OH})](\text{NO}_3)_2$  (3) in water.

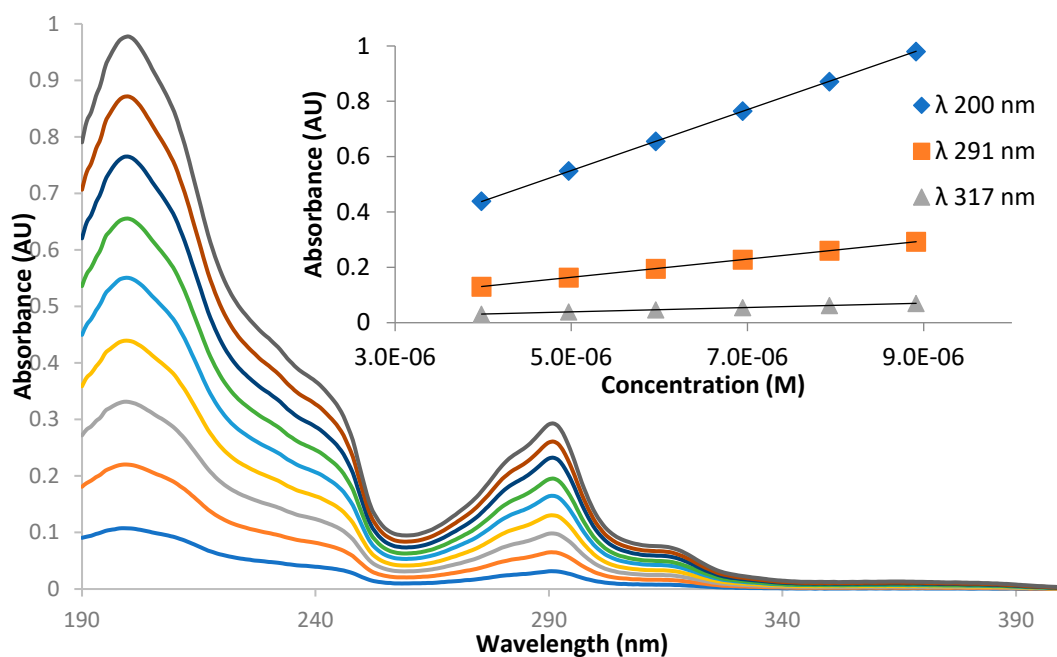

**Figure S34.** The UV spectrum of a replicate of  $[\text{Pt}(\text{56Me}_2\text{Phen})(\text{SSDACH})(\text{Aspirin})(\text{OH})](\text{NO}_3)_2$  (4) in water.

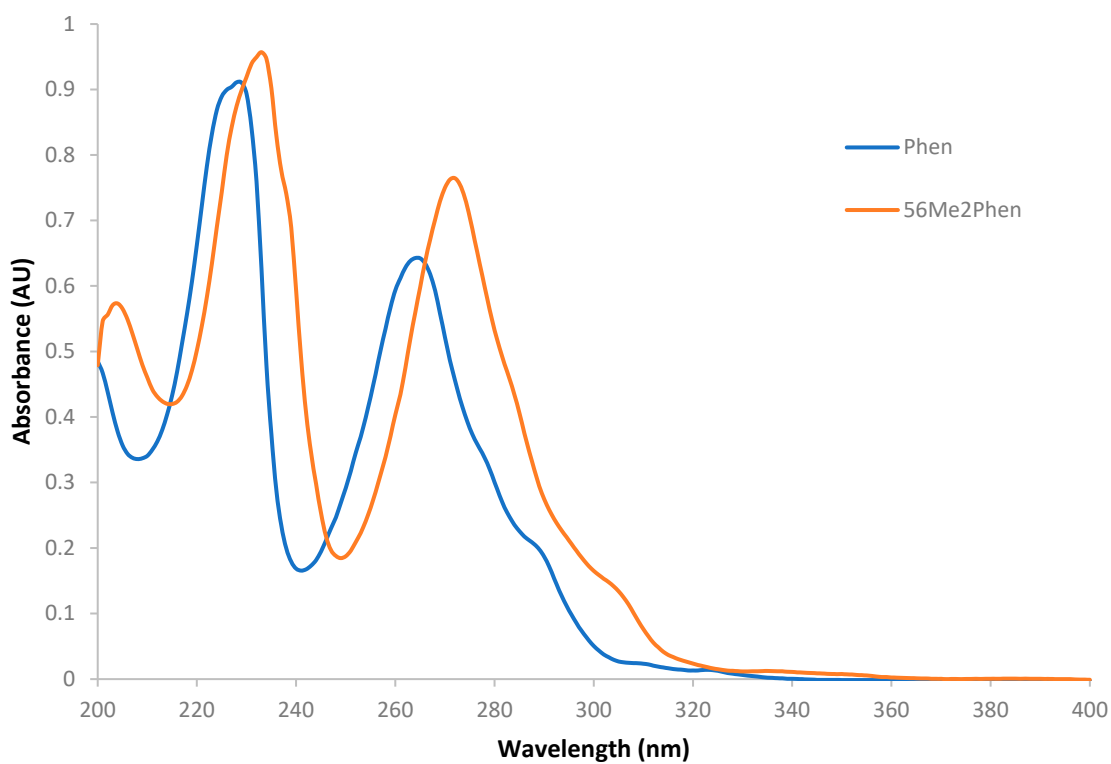

**Figure S35.** The UV spectra of Phen (in water) and 56Me<sub>2</sub>Phen (in MeOH).

## 8. CD and SRCD Spectra

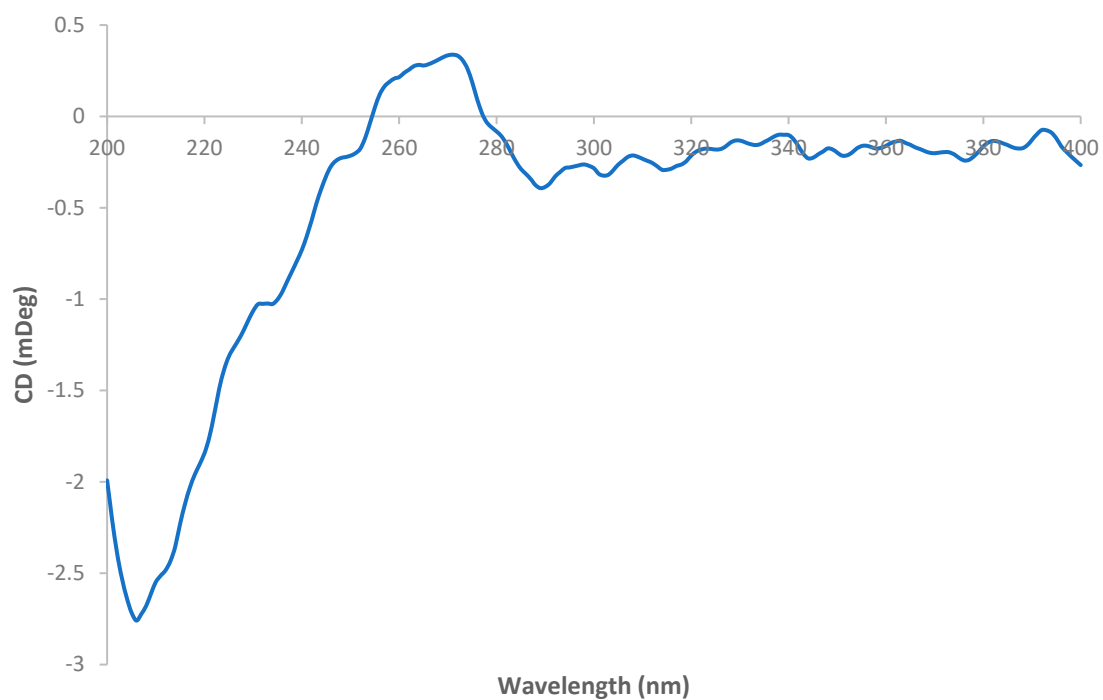

**Figure S36.** The CD spectrum of [Pt(Phen)(SSDACH)(Indomethacin)(OH)](NO<sub>3</sub>)<sub>2</sub> (**1**) in water. 9pt smoothing applied.

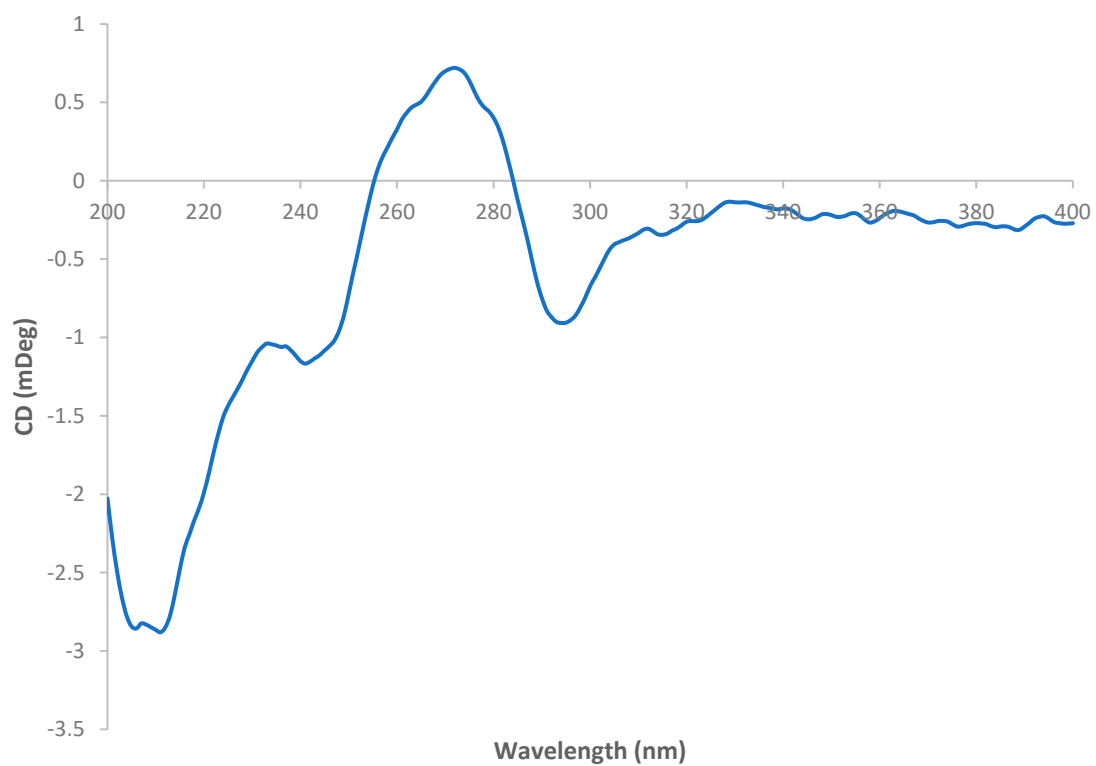

**Figure S37.** The CD spectrum of [Pt(56Me<sub>2</sub>Phen)(SSDACH)(Indomethacin)(OH)](NO<sub>3</sub>)<sub>2</sub> (**2**) in water. 9pt smoothing applied.

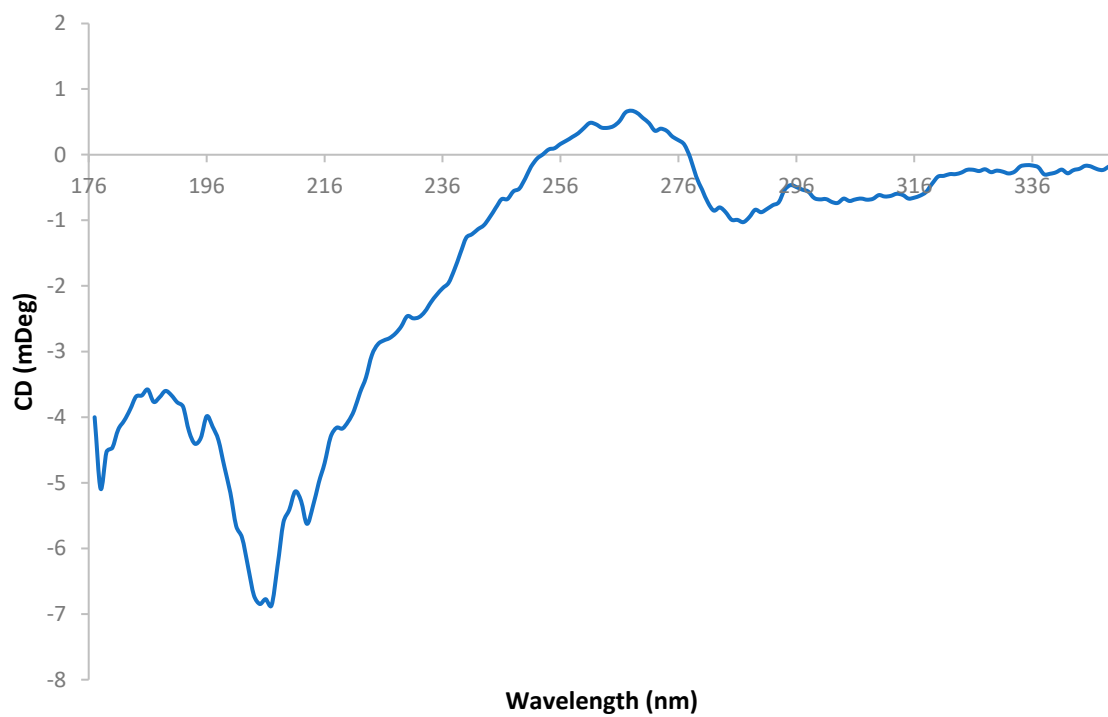

**Figure S38.** The SRCD spectrum of [Pt(Phen)(SSDACH)(Indomethacin)(OH)](NO<sub>3</sub>)<sub>2</sub> (**1**) in water. 7pt smoothing applied.

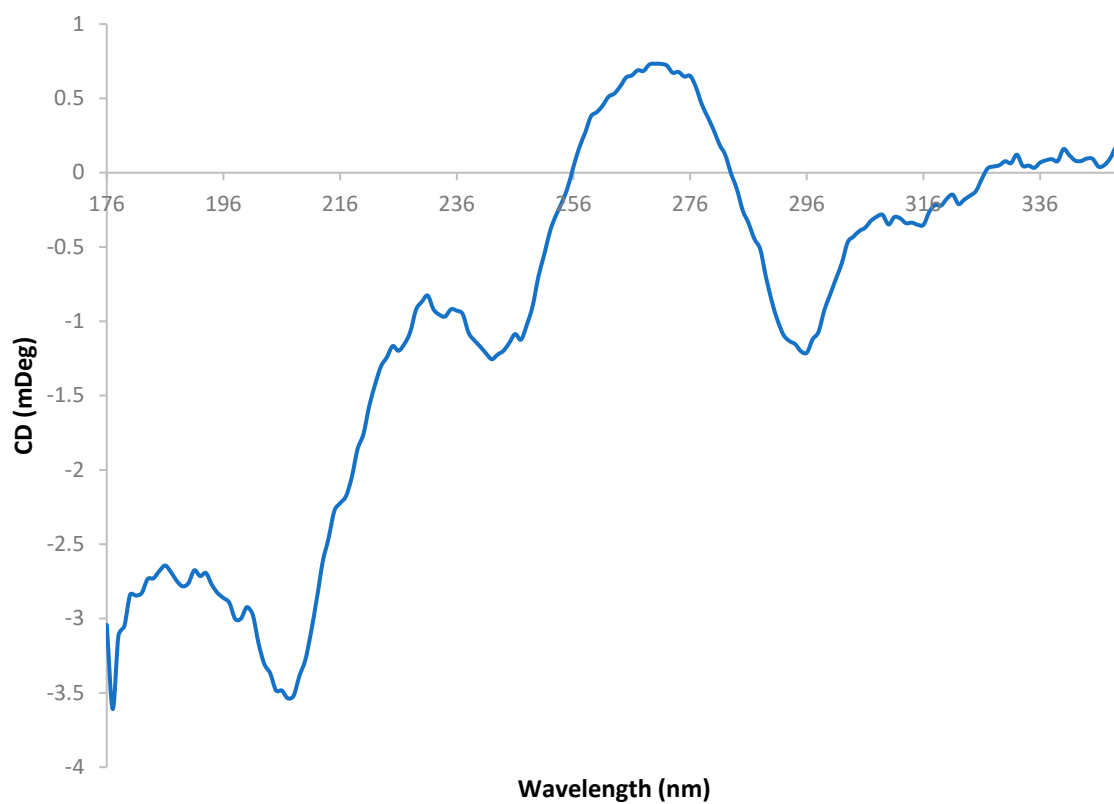

**Figure S39.** The SRCD spectrum of [Pt(56Me<sub>2</sub>Phen)(SSDACH)(Indomethacin)(OH)](NO<sub>3</sub>)<sub>2</sub> (**2**) in water. 7pt smoothing applied.

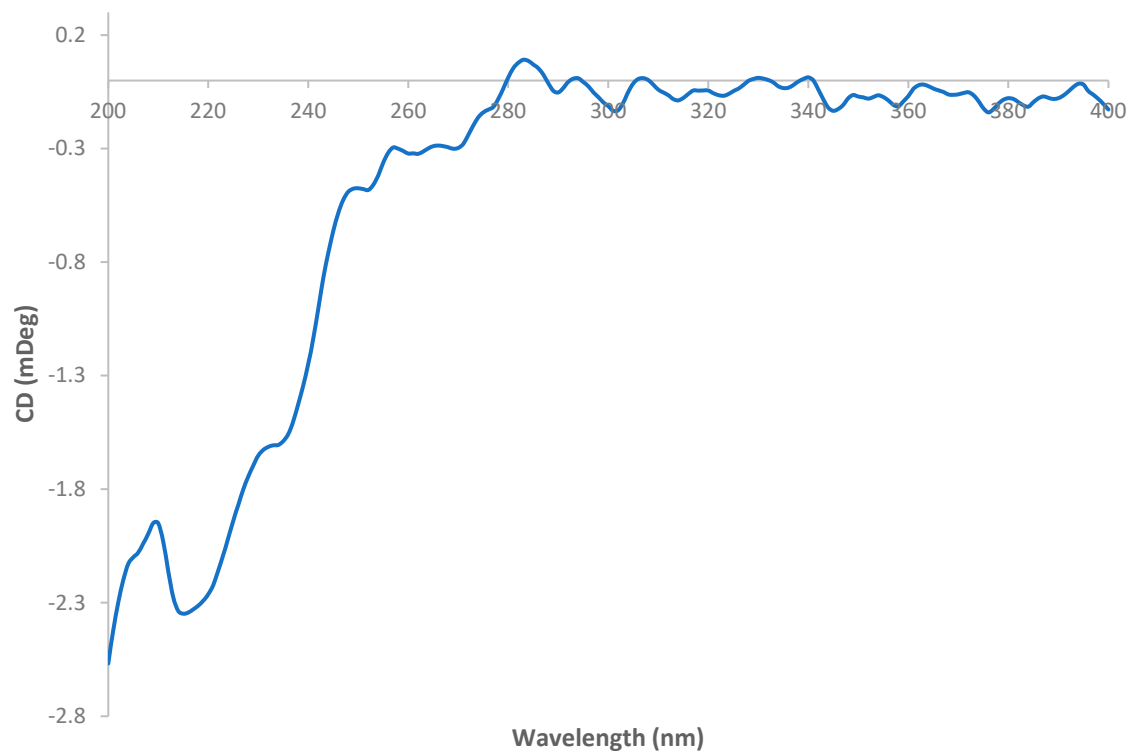

**Figure S40.** The CD spectrum of [Pt(Phen)(SSDACH)(Aspirin)(OH)](NO<sub>3</sub>)<sub>2</sub> (**3**) in water. 9pt smoothing applied.

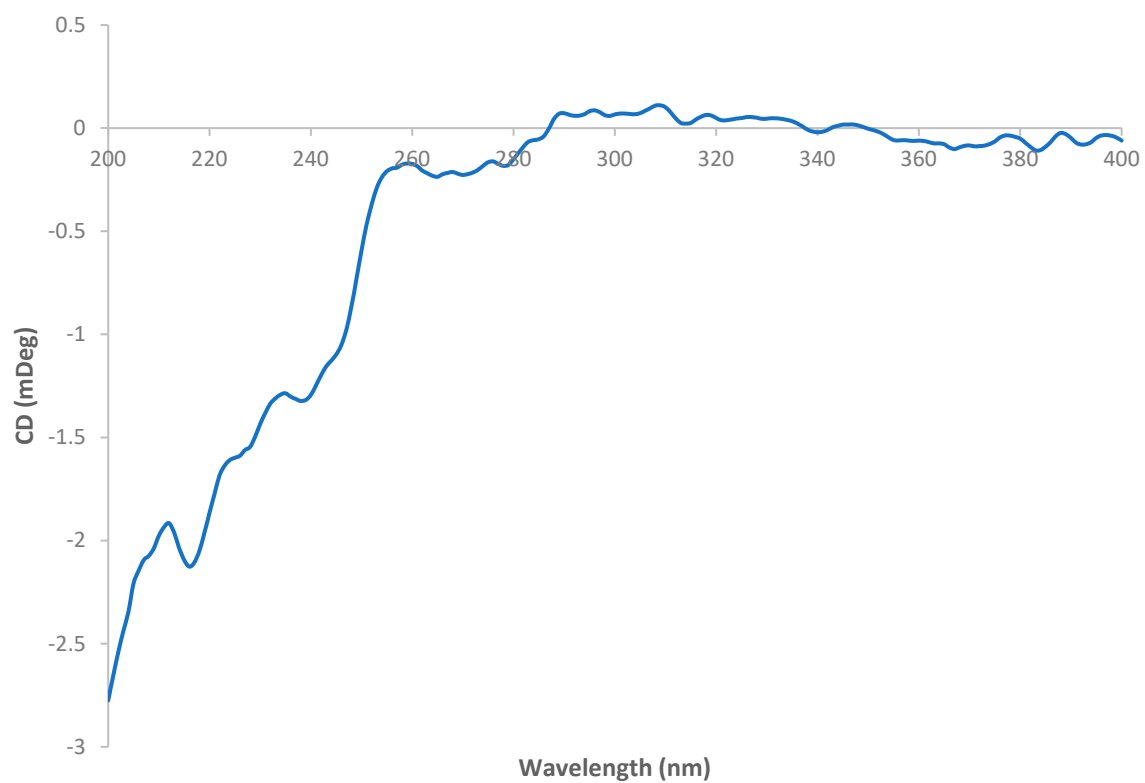

**Figure S41.** The CD spectrum of [Pt(56Me<sub>2</sub>Phen)(SSDACH)(Aspirin)(OH)](NO<sub>3</sub>)<sub>2</sub> (**4**) in water. 9pt smoothing applied.

## 9. Reduction Studies

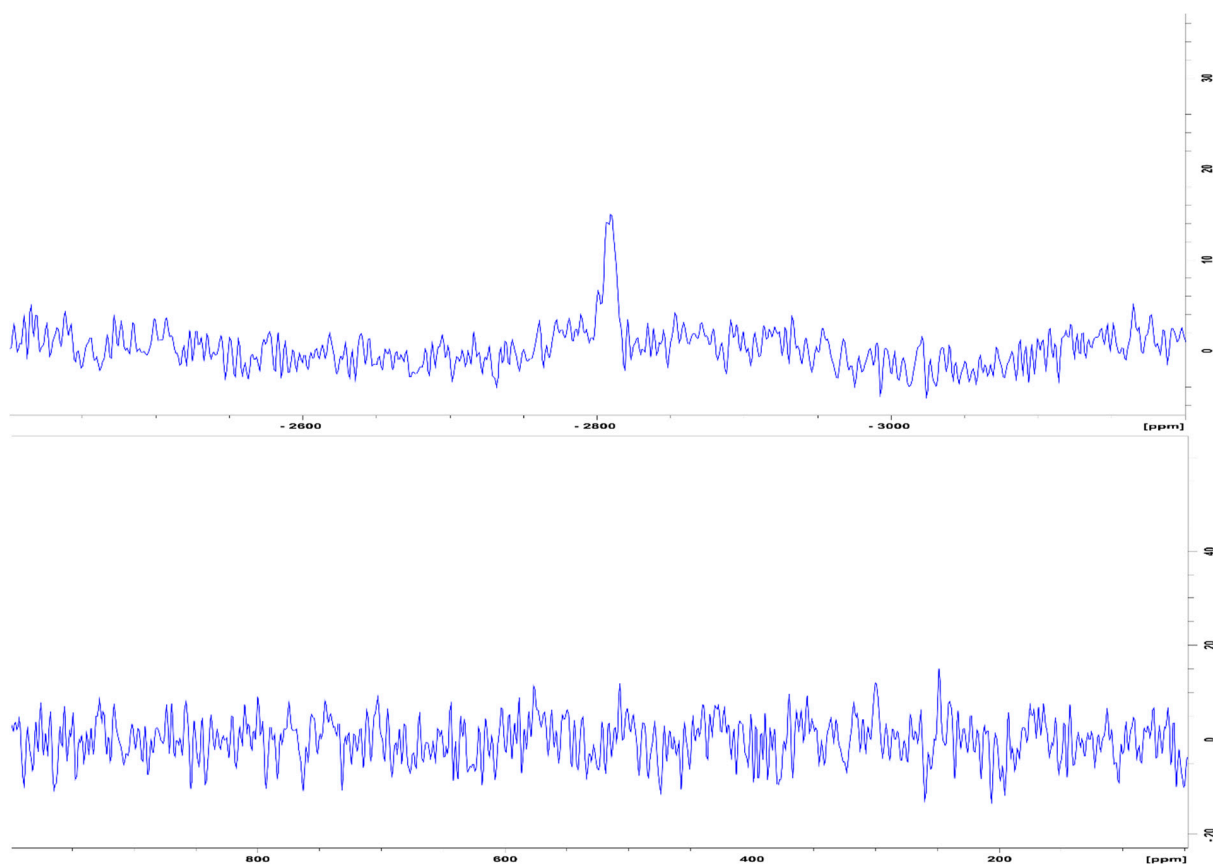

**Figure S42.** The  $^{195}\text{Pt}$  NMR spectra of **3** with 10X PBS in  $\text{D}_2\text{O}$  after being reduced with ascorbic acid, showing the new peak that developed in the platinum(II) region (top) and the disappearance of the peak in the platinum(IV) region (bottom).

## 10. Lipophilicity Studies

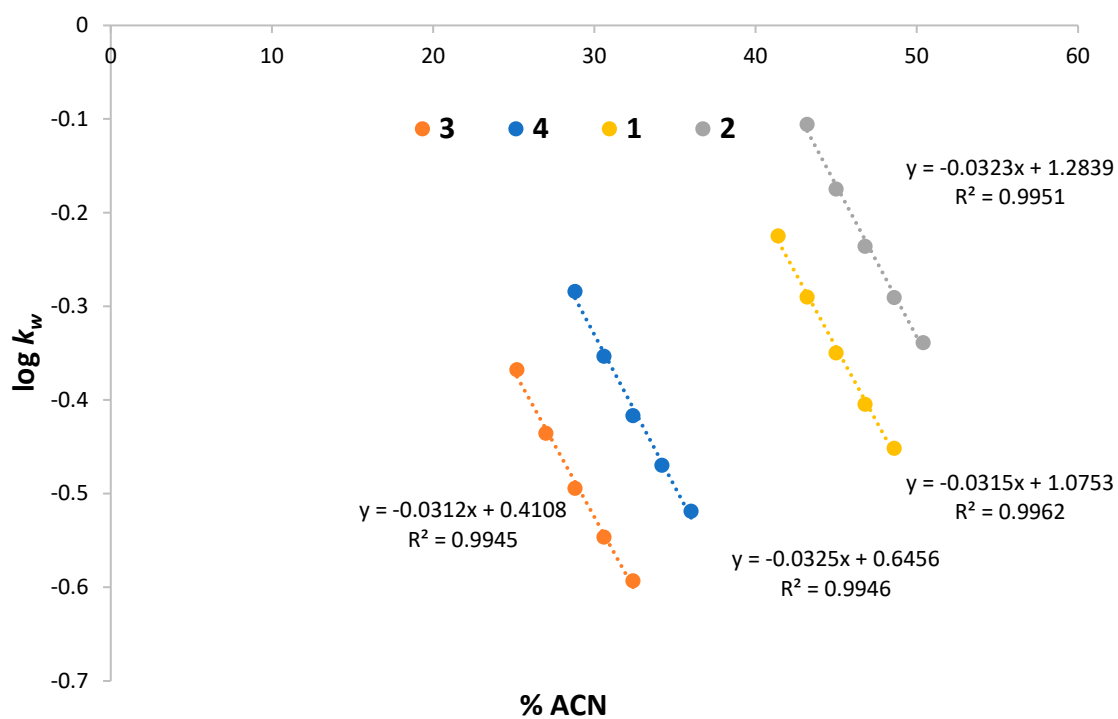

**Figure S43.** Plot of the concentration of organic solvent vs.  $\log k_w$  for **1–4**.



## 11. *In vitro* Cytotoxicity Studies

**Table S4.** The *in vitro* cytotoxicity values of complexes **1–4**, their free ligands, platinum(II) and platinum(IV) di-hydroxido precursors, cisplatin, carboplatin and oxaliplatin. GI<sub>50</sub> values (nM) are reported with standard error of the mean; produced from experiments that were conducted on three separate occasions (n = 3); n.d. = not determined.

| Compound           | GI <sub>50</sub> ± SEM (nM) |             |              |             |              |              |              |              |             |             |            |              |
|--------------------|-----------------------------|-------------|--------------|-------------|--------------|--------------|--------------|--------------|-------------|-------------|------------|--------------|
|                    | HT29                        | U87         | MCF-7        | A2780       | H460         | A431         | Du145        | BE2-C        | SJ-G2       | MIA         | MCF10A     | ADDP         |
| Indomethacin       | >50000                      | >50000      | >50000       | 5700 ± 800  | >50000       | >50000       | >50000       | >50000       | >50000      | >50000      | >50000     | >50000       |
| Aspirin            | >50000                      | >50000      | >50000       | >50000      | >50000       | >50000       | >50000       | >50000       | >50000      | >50000      | >50000     | >50000       |
| <b>1</b>           | 83 ± 40                     | 1300 ± 270  | 740 ± 230    | 390 ± 87    | 370 ± 55     | 400 ± 84     | 160 ± 54     | n.d.         | 970 ± 290   | 330 ± 55    | 340 ± 100  | 350 ± 81     |
| <b>2</b>           | 13 ± 3.6                    | 47 ± 4.9    | 37 ± 2.3     | 34 ± 8.6    | 22 ± 4.2     | 40 ± 14      | 7.5 ± 3.6    | 130 ± 41     | 170 ± 19    | 21 ± 2      | 23 ± 8.2   | 24 ± 6.1     |
| <b>3</b>           | 140 ± 10                    | 600 ± 60    | 390 ± 80     | 260 ± 30    | 350 ± 20     | 670 ± 100    | 140 ± 10     | 620 ± 90     | 360 ± 60    | 160 ± 30    | 210 ± 29   | 200 ± 0      |
| <b>4</b>           | 7 ± 1                       | 24 ± 0      | 36 ± 10      | 22 ± 0      | 15 ± 1       | 31 ± 0       | 3 ± 1        | 98 ± 21      | 63 ± 6      | 8 ± 1       | 9 ± 2      | 12 ± 0       |
| PHENSS(II)         | 87 ± 27                     | 1200 ± 340  | 250 ± 41     | 290 ± 37    | 300 ± 32     | 340 ± 100    | 110 ± 27     | 390 ± 60     | 440 ± 55    | 240 ± 22    | 240 ± 60   | 230 ± 49     |
| 56MESS(II)         | 15 ± 6.2                    | 76 ± 8.7    | 33 ± 12      | 39 ± 7.7    | 28 ± 4.7     | 36 ± 11      | 10 ± 1.3     | 86 ± 3       | 150 ± 6.7   | 22 ± 0.88   | 25 ± 10    | 27 ± 4.1     |
| PHENSS(IV)<br>[1]  | 710 ± 300                   | 4900 ± 610  | 16000 ± 4500 | 800 ± 84    | 1700 ± 200   | 4300 ± 530   | 310 ± 92     | 3000 ± 530   | 1700 ± 350  | 3400 ± 2200 | 1700 ± 200 | 1300 ± 350   |
| 56MESS(IV)         | 36 ± 7                      | 190 ± 23    | 480 ± 140    | 56 ± 7.1    | 190 ± 150    | 120 ± 22     | 15 ± 2.6     | 240 ± 22     | 210 ± 45    | 43 ± 2.5    | 61 ± 7.3   | 170 ± 120    |
| Cisplatin<br>[2]   | 11300 ± 1900                | 3800 ± 1100 | 6500 ± 800   | 1000 ± 100  | 900 ± 200    | 2400 ± 300   | 1200 ± 100   | 1900 ± 200   | 400 ± 100   | 7500 ± 1300 | 5200 ± 520 | 28000 ± 1700 |
| Oxaliplatin<br>[2] | 900 ± 200                   | 1800 ± 200  | 500 ± 100    | 160 ± 0     | 1600 ± 100   | 4100 ± 500   | 2900 ± 400   | 900 ± 200    | 3000 ± 1200 | 900 ± 200   | n.d.       | 822 ± 130    |
| Carboplatin<br>[2] | >50000                      | >50000      | >50000       | 9200 ± 2900 | 14000 ± 1000 | 24300 ± 2200 | 14700 ± 1200 | 18700 ± 1200 | 5700 ± 200  | >50000      | >50000     | >50000       |

## 12. COX Inhibition Assay

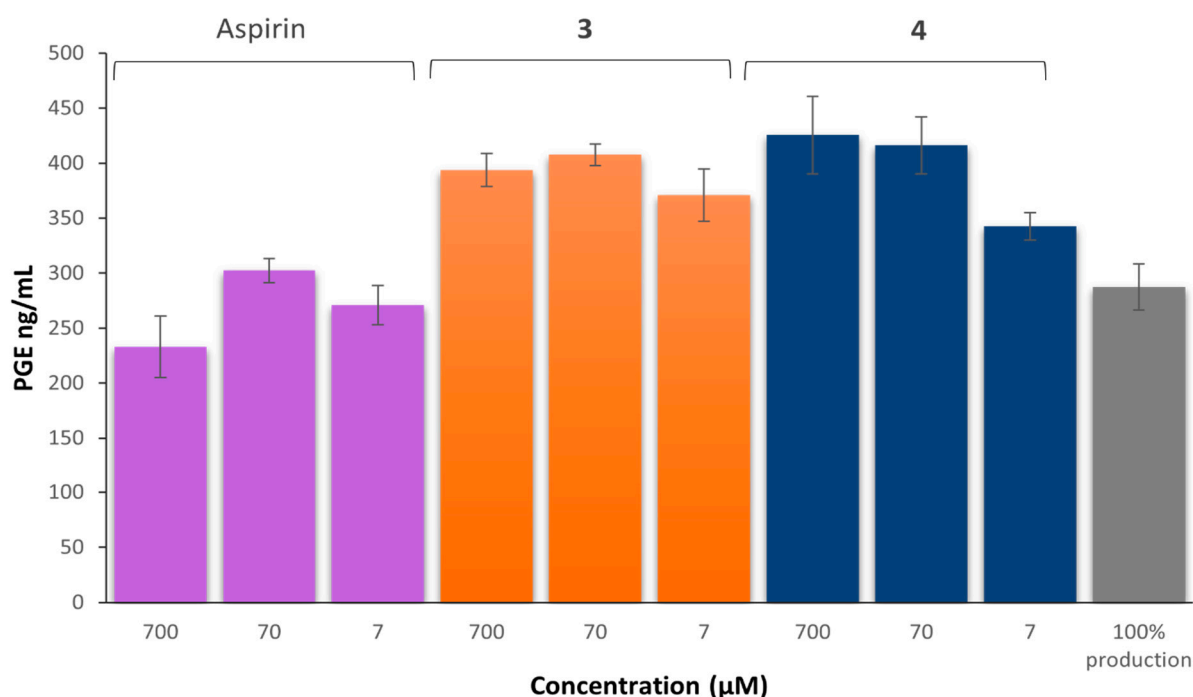

**Figure S44.** Inhibition of human COX- 2 by aspirin, **3** and **4**. Error bars are the average of triplicates from one experiment.

### 13. Platinum Uptake Studies

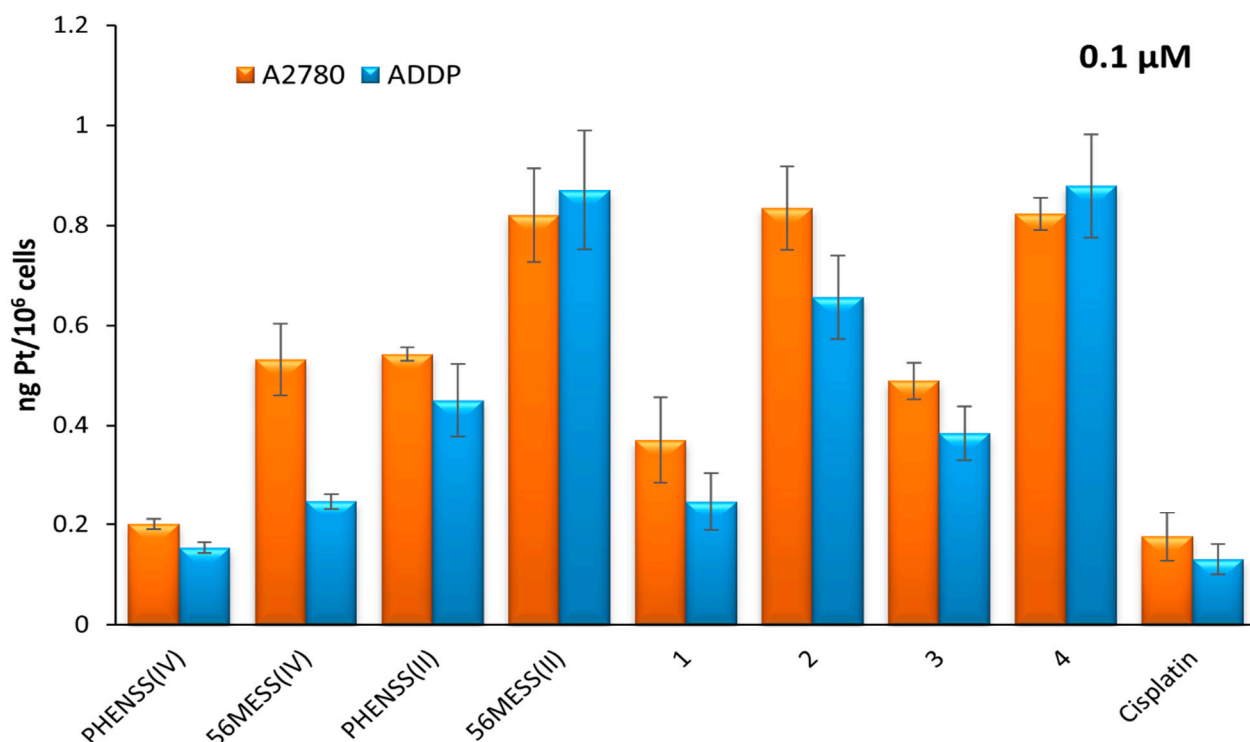

**Figure S45.** Cellular accumulation levels of **1–4**, their platinum(II) and platinum(IV) precursors and cisplatin against A2780 (ovarian) and ADDP (cisplatin-resistant ovarian) cancer cells that were treated with 0.1  $\mu$ M for 4 hours. Values are reported in ng Pt/10<sup>6</sup> cells and are reported with standard error of the mean; produced from three independent experiments.

### References

1. Deo, K. M.; Sakoff, J.; Gilbert, J.; Zhang, Y.; Wright, J. R. A., Synthesis, characterisation and potent cytotoxicity of unconventional platinum (IV) complexes with modified lipophilicity. *Dalton Trans.* **2019**, 48, 17217–17227.
2. Macias, F. J.; Deo, K. M.; Wormell, P.; Clegg, J. K.; Zhang, Y.; Li, F.; Zheng, G.; Sakoff, J.; Gilbert, J.; Aldrich-Wright, J. R., Synthesis and analysis of the structure, diffusion and cytotoxicity of heterocyclic platinum (IV) complexes. *Eur. J. Chem.* **2015**, 21, 16990–17001.
